# Supplementary material for: Affinity-matured homotypic interactions induce spectrum of PfCSP structures that influence protection from malaria infection
Source: PubMed Central journal article supplement (PMC10382551; doi:10.1038/s41467-023-40151-x), 2023-07-28
Supplement: 41467_2023_40151_MOESM1_ESM.pdf [file 41467_2023_40151_MOESM1_ESM.pdf]

## **Affinity-matured homotypic interactions induce spectrum of PfCSP-antibody structures that influence protection from malaria infection**

Gregory M. Martin<sup>1</sup>, Jonathan L. Torres<sup>1</sup>, Tossapol Pholcharee<sup>1,7</sup>, David Oyen<sup>1,8</sup>, Yewel Flores-Garcia<sup>2</sup>, Grace Gibson<sup>1</sup>, Re'em Moskovitz<sup>1</sup>, Nathan Beutler<sup>3</sup>, Diana D. Jung<sup>1</sup>, Jeffrey Copps<sup>1</sup>, Wen-Hsin Lee<sup>1</sup>, Gonzalo Gonzalez-Paez<sup>1</sup>, Daniel Emerling<sup>5</sup>, Randall S. MacGill<sup>6</sup>, Emily Locke<sup>6</sup>, C. Richter King<sup>6</sup>, Fidel Zavala<sup>2</sup>, Ian A. Wilson<sup>1,4</sup>, Andrew B. Ward<sup>1\*</sup>

### **Affiliations**

<sup>1</sup>Department of Integrative Structural and Computational Biology; The Scripps Research Institute; La Jolla, CA 92037; USA.

<sup>2</sup>Department of Molecular Microbiology and Immunology, Malaria Research Institute; Johns Hopkins Bloomberg School of Public Health; Baltimore, MD 21205; USA.

<sup>3</sup>Department of Immunology and Microbiology; The Scripps Research Institute; La Jolla, CA 92037; USA.

<sup>4</sup>The Skaggs Institute for Chemical Biology; The Scripps Research Institute; La Jolla, CA 92037; USA.

<sup>5</sup>Atreca Inc; San Carlos, CA 94070; USA.

<sup>6</sup>PATH's Malaria Vaccine Initiative; Washington, DC 20001; USA.

<sup>7</sup>Present address: Department of Biochemistry, University of Oxford, Oxford OX1 3DR; UK.

<sup>8</sup>Present address: Pfizer Inc; San Diego, CA 92121; USA.

\*Correspondence: [andrew@scripps.edu](mailto:andrew@scripps.edu)

## VH3-33

227

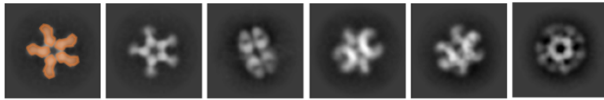

239

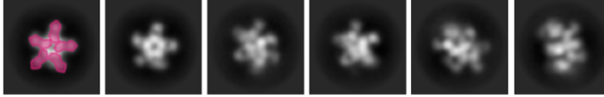

311

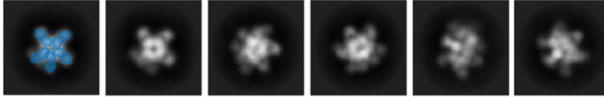

334

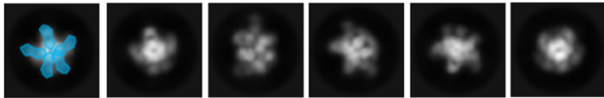

337

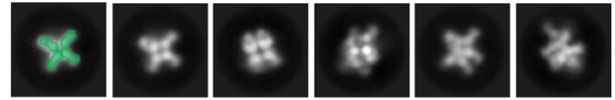

356

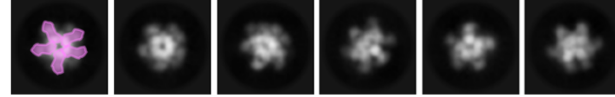

364

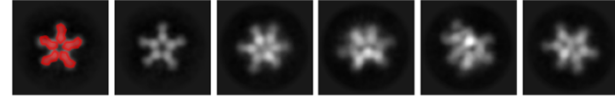

## VH3-30

317 (Oyen et al. 2018)

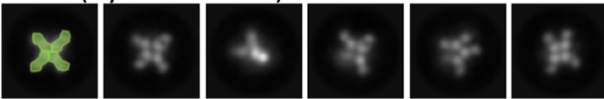

FO142

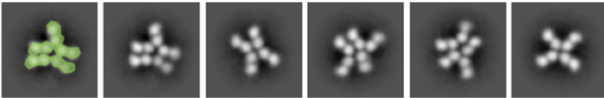

FO181

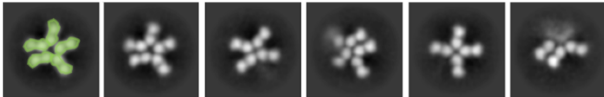

## VH3-49

224

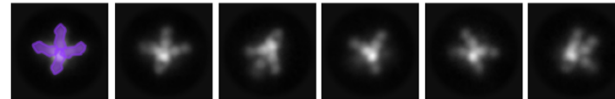

250

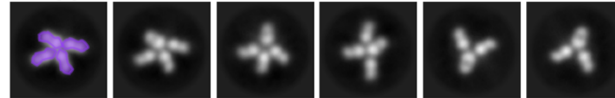

399

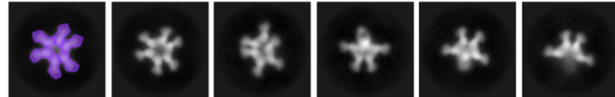

## VH3-15

397 (Pholcharee et al. 2020)

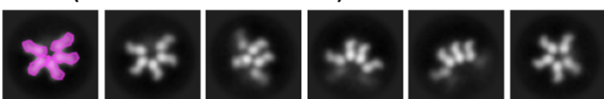

## VH1-2

366

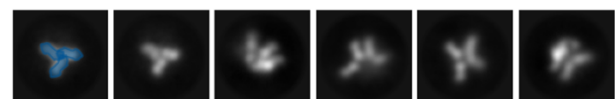

Supplementary Figure 1. **Representative 2D class averages from negative stain EM of anti-NPNA Fabs in complex with rsCSP.** To aid visualization, individual Fabs are colored representing the first (leftmost) class average of each mAb (grey). 2D classes for 317<sup>1</sup> and 397<sup>2</sup> were reprocessed herein from their original, previously published, datasets.

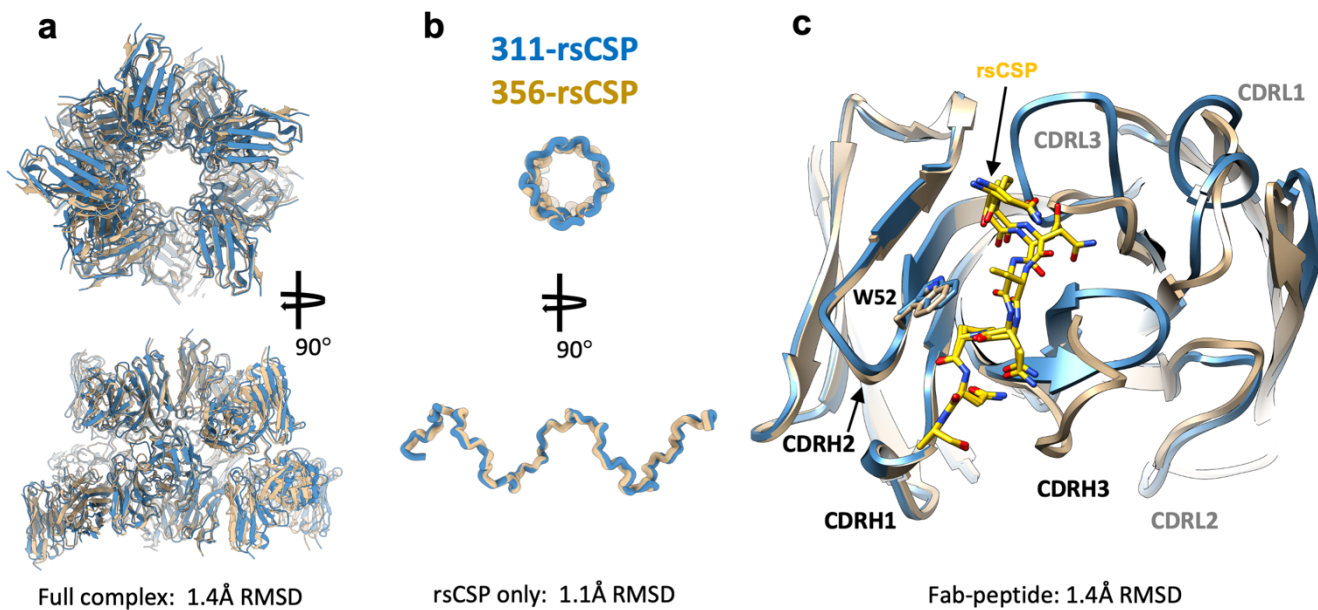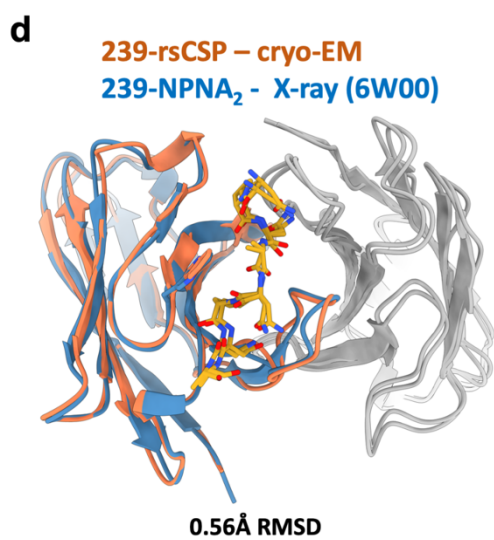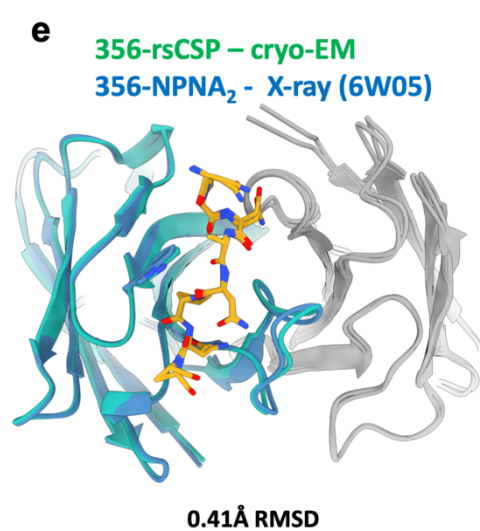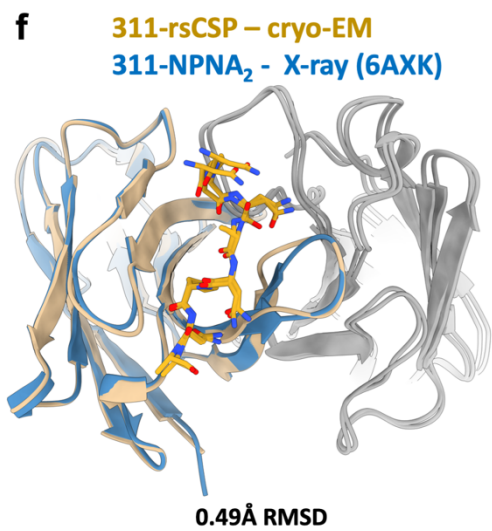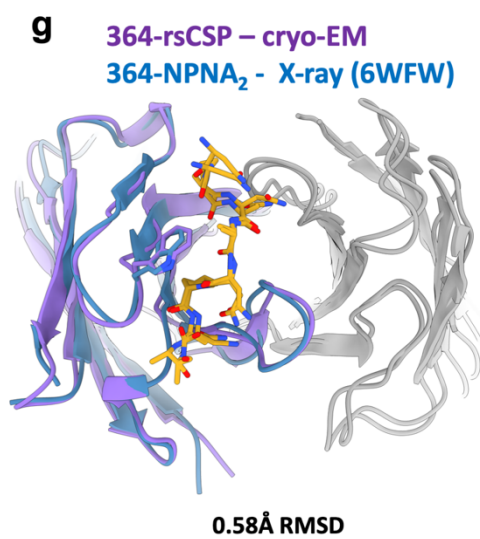

Supplementary Figure 2. **Comparison of cryo-EM structures and previously-published Fab-peptide X-ray structures.** **a-b** Comparison of 311-rsCSP and 356-rsCSP cryo-EM structures from this study. **a** Top (left) and side (right) views of superposition of 311 (blue) and 356 (tan) complexes. **b** Same as in (a), showing only the rsCSP helical spiral to highlight high similarity of CSP helical structures. **c** Superposition of a single Fab from the 311 and 356 cryo-EM structures; CSP is in gold. **d-g** Comparison of cryo-EM structures of Fabs with X-ray crystal structures of corresponding Fabs bound to NPNA peptides. **d** 239-rsCSP cryo-EM and 239-NPNA<sub>2</sub> X-ray. **e** 356-rsCSP cryo-EM and 356-NPNA<sub>2</sub> X-ray. **f** 311-rsCSP cryo-EM and 311-NPNA<sub>2</sub> X-ray. **g** 364-rsCSP cryo-EM and 364-NPNA<sub>2</sub> X-ray. **239, 356, 364:** Pholcharee et al. 2021<sup>3</sup>. **311:** Oyen et al. 2017<sup>1</sup>.





Supplementary Figure 3. **Multiple sequence alignment of heavy chain and light chain variable regions of the seven *IGHV3-33* mAbs in this study with inferred germline genes.** **a** Heavy chains aligned to *IGHV3-33\*01*. **b** *IGLV1-40* light chains. **c** *IGKV1-5* light chains. **d** *IGKV3-15* light chains.

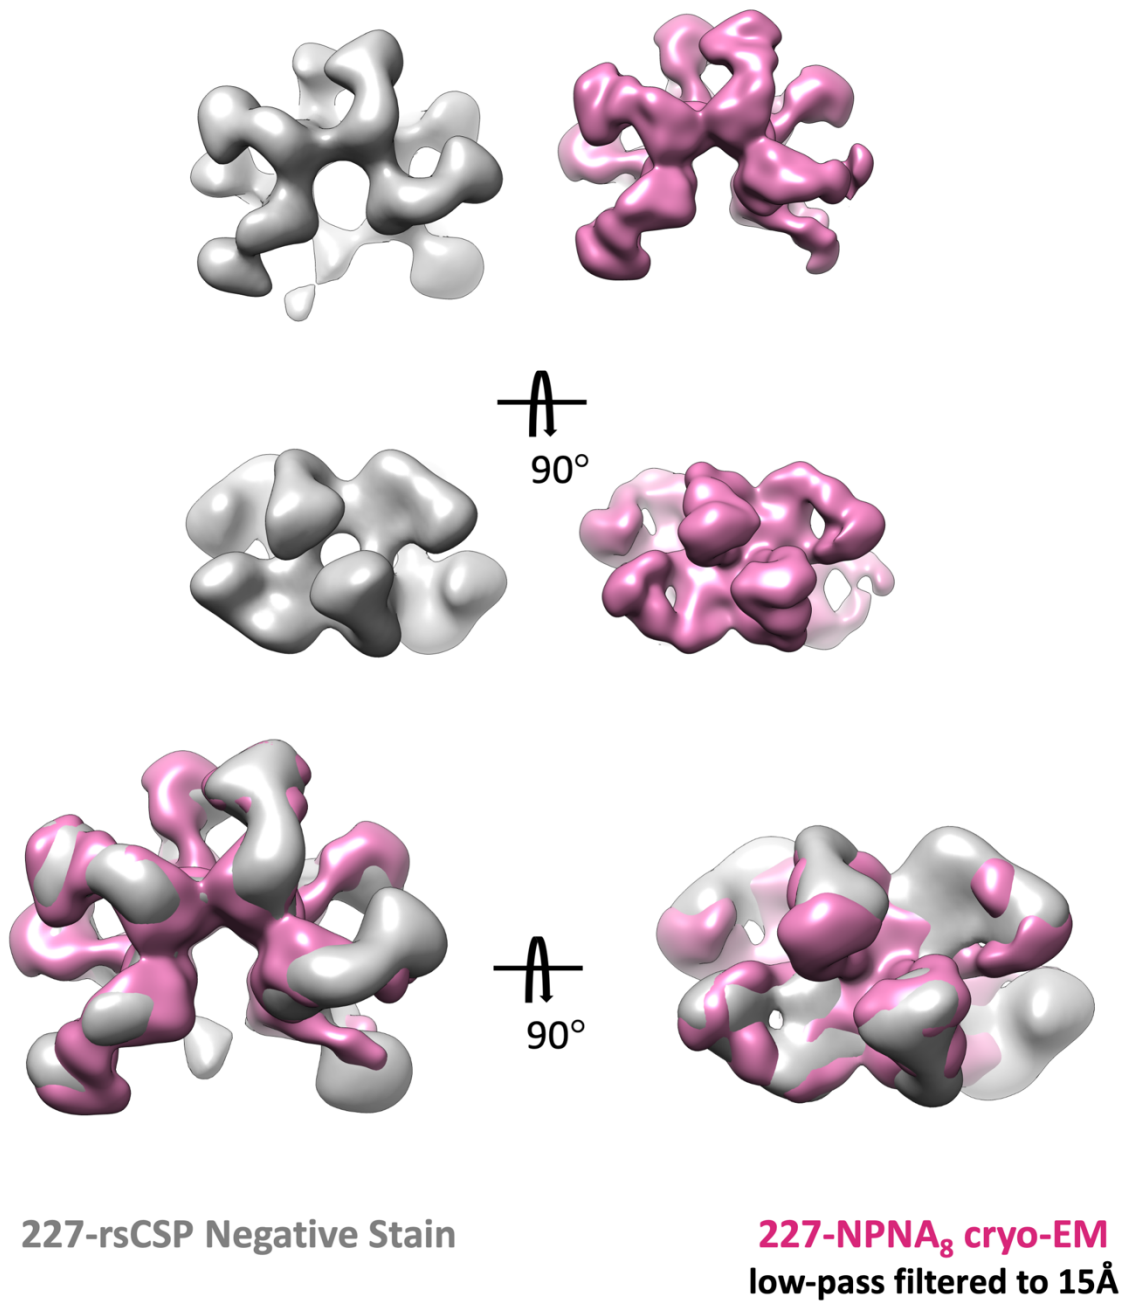

Supplementary Figure 4. **227-NPNA<sub>8</sub> and 227-rsCSP structures are nearly identical.** Comparison of negative stain reconstruction of 227 Fab in complex with rsCSP (gray) and cryo-EM structure of 227 Fab in complex with NPNA<sub>8</sub> peptide (violet).

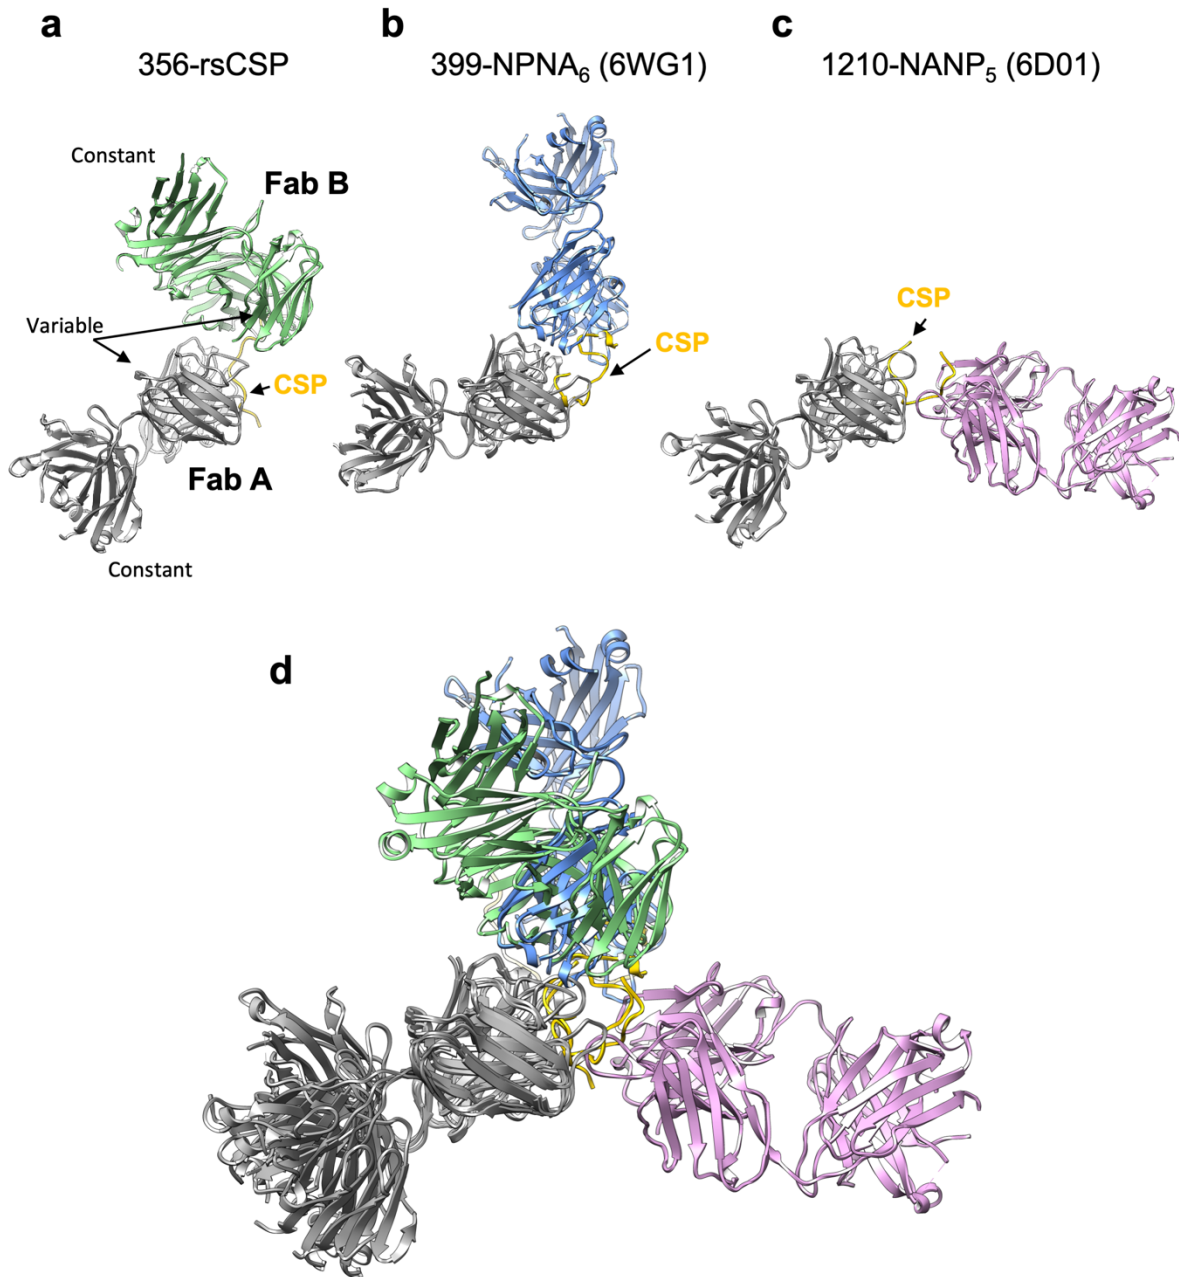

Supplementary Figure 5. **Comparison of homotypic antibody-antibody binding observed in anti-NPNA mAbs.**

**Fabs A of 399 and 1210 were aligned to Fab A of 356 cryo-EM structure for comparison of the position of Fab B relative to Fab A.** **a** Two adjacent Fabs from 356-rsCSP cryo-EM structure, which result in an asymmetric, edge-to-edge interaction. **b** 399-NPNA<sub>6</sub> X-ray crystal structure. Note in this structure, nearly all homotypic interactions derive from the heavy chain, and produce a fully symmetric, head-to-head interface. **c** 1210-NANP<sub>5</sub> X-ray structure, which gives rise to an asymmetric, head-to-head homotypic interface. **d** Superposition of each structure.



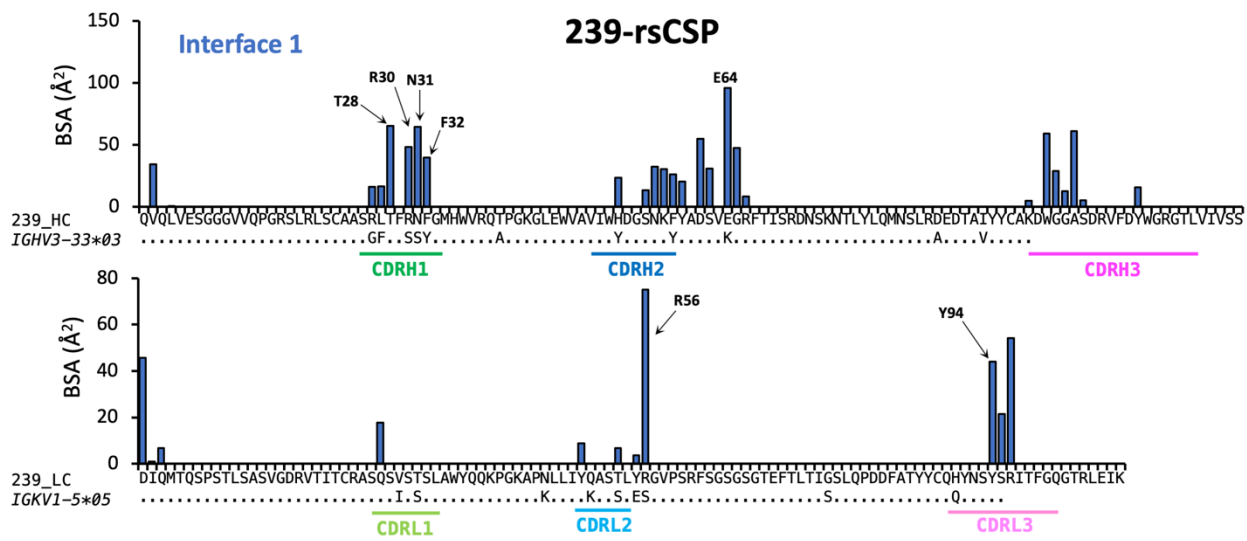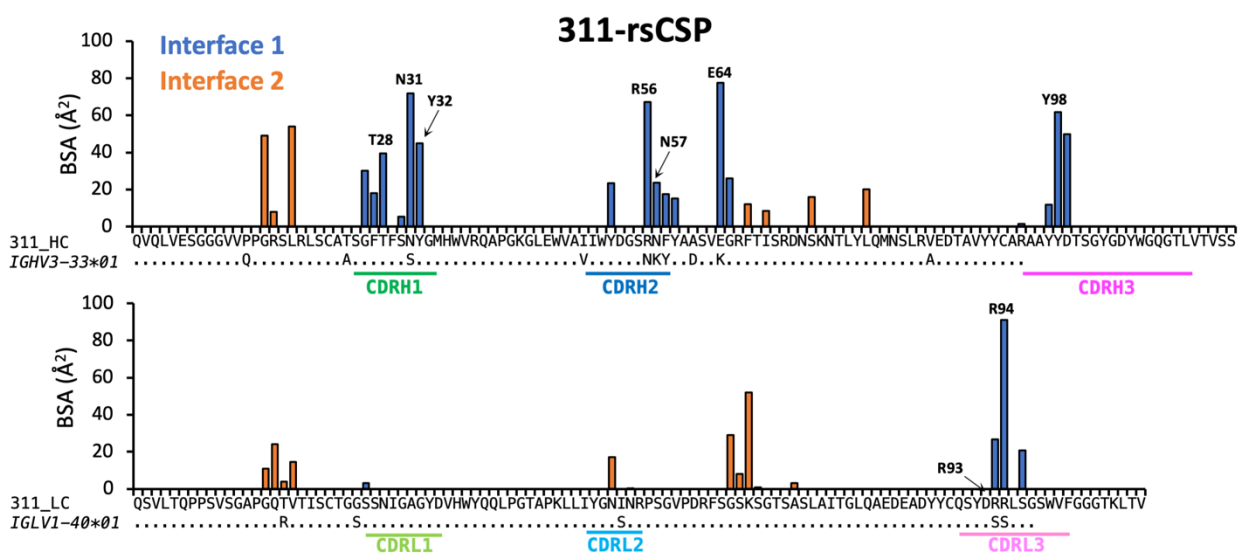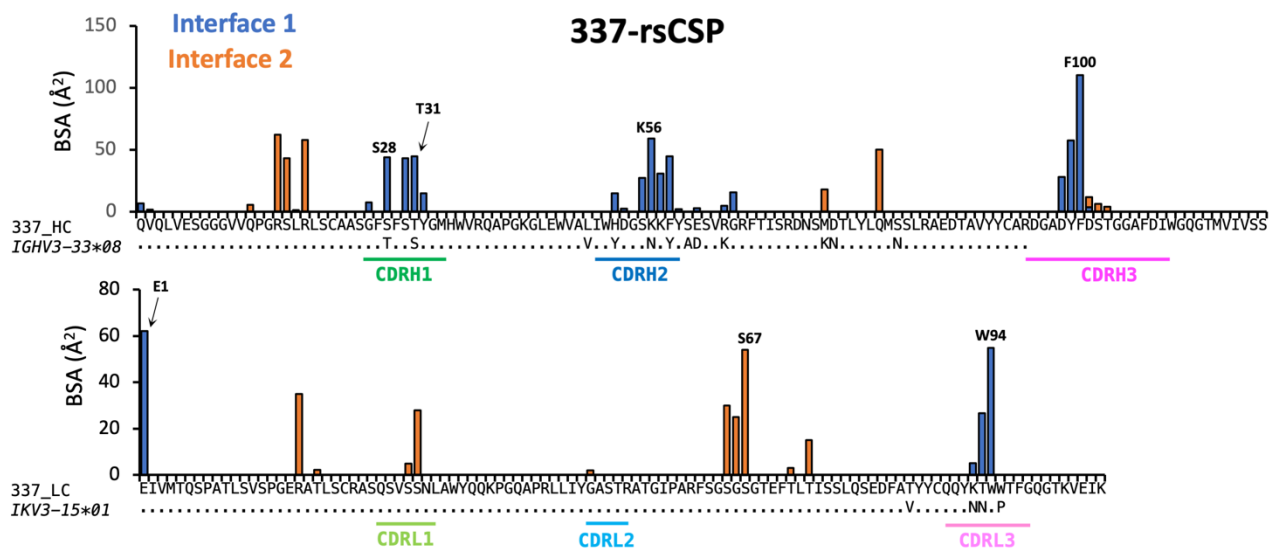

Supplementary Figure 6. Buried surface area plots for primary and secondary homotypic interfaces for 239, 311, and 337 Fab-rsCSP cryo-EM structures. Key residues are labelled according to Kabat numbering system.



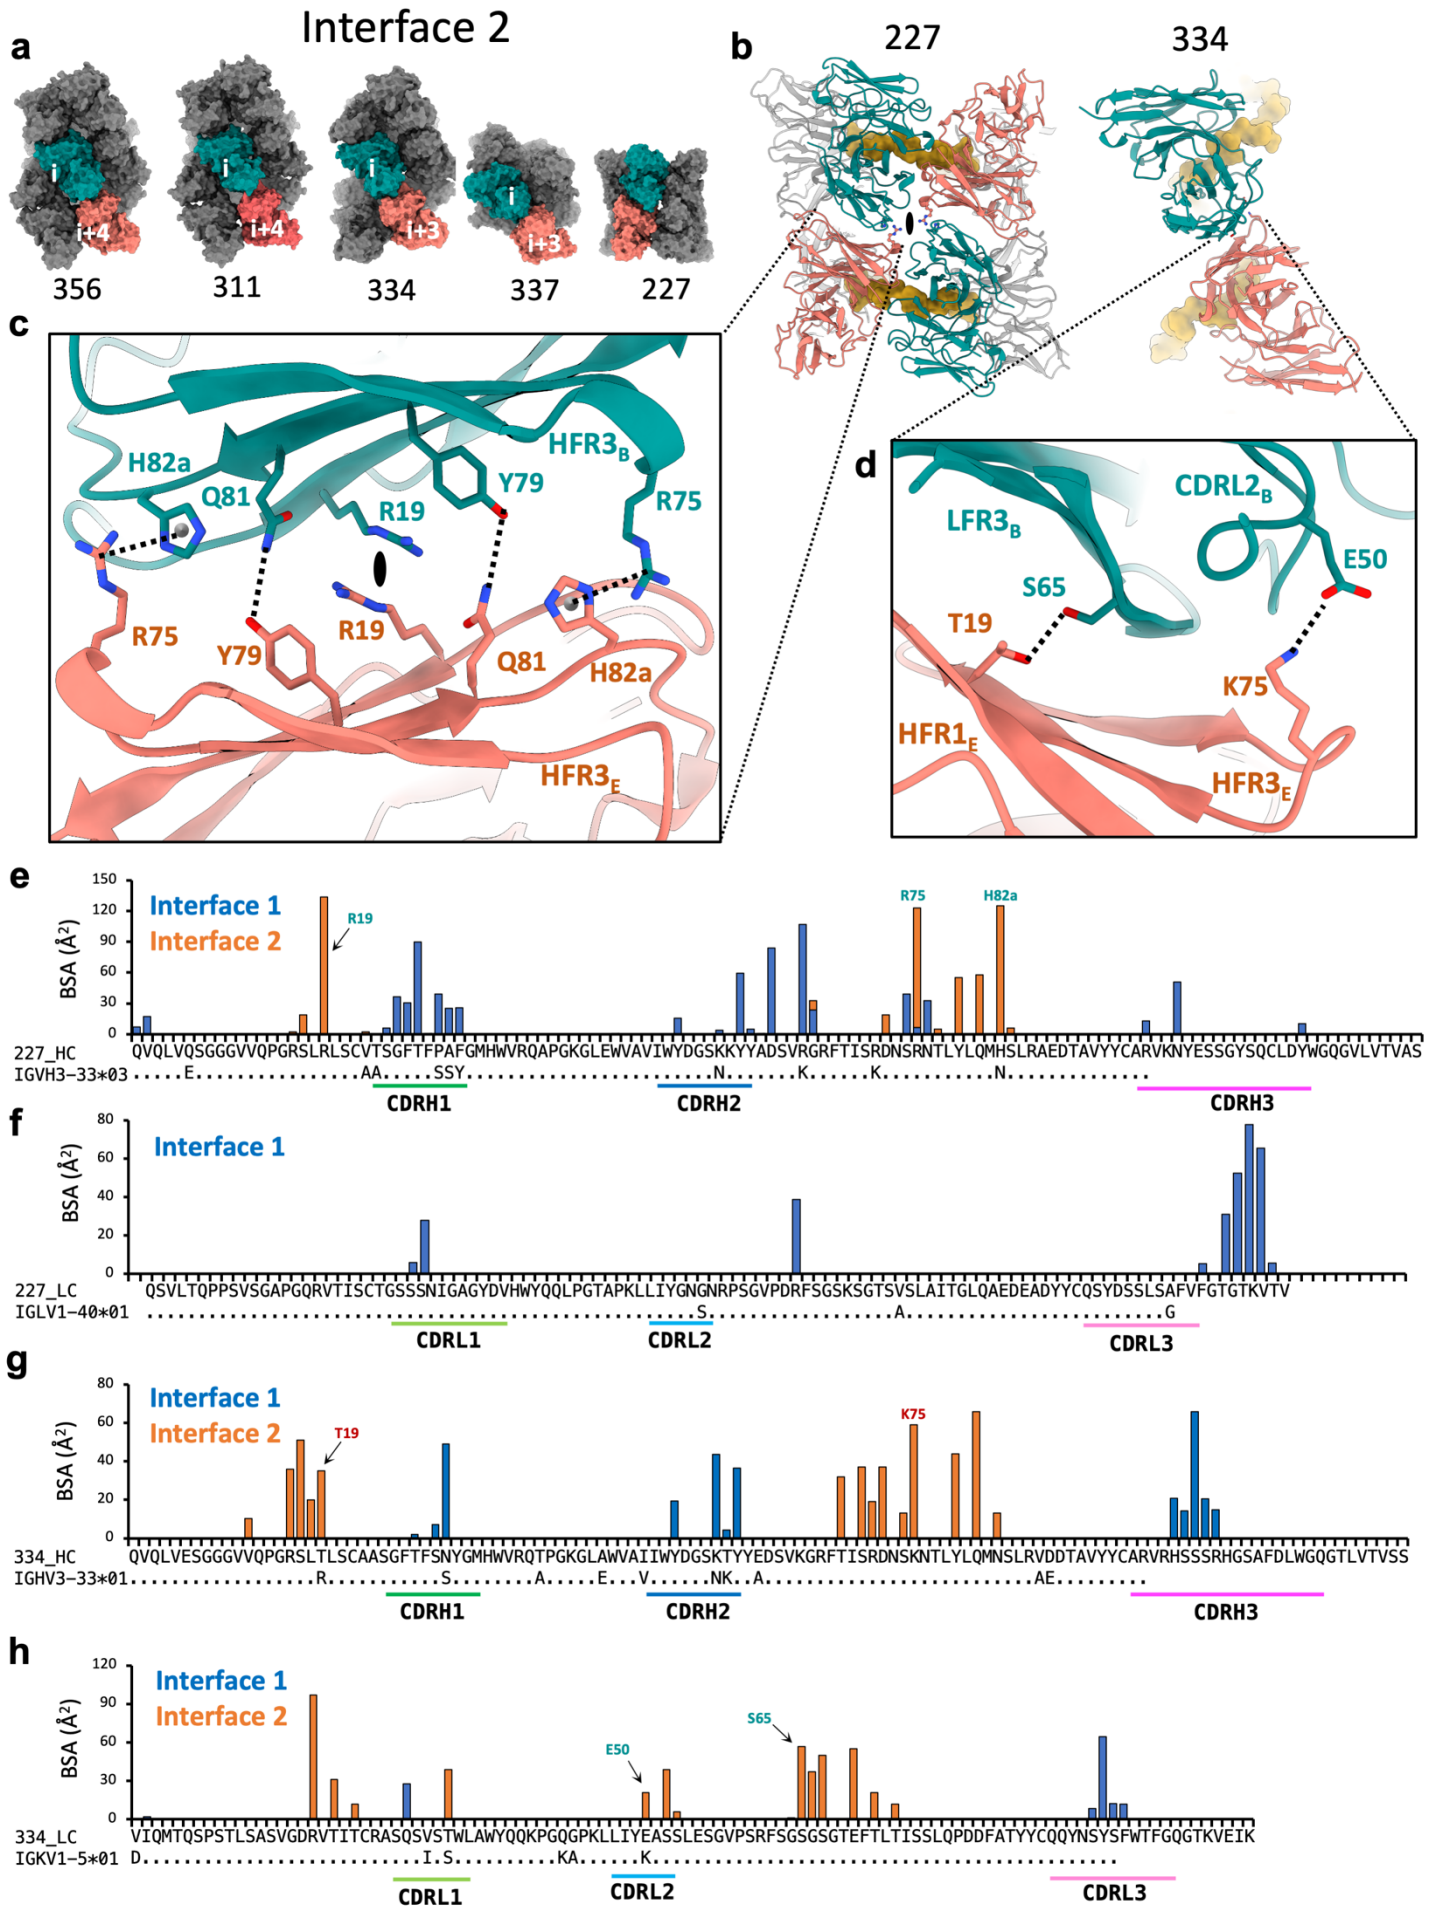



Supplementary Figure 7. **Structure of the secondary homotypic interface (Interface 2).** **a** Surface representation of the five structures in the panel that contain a secondary homotypic interface, which exists between Fabs separated by one helical turn (Fab  $i$  and  $i+x$ ). **b** Cartoon representation of 227 and 334, highlighting the secondary interface. rsCSP is shown as a gold surface. Only Fabs  $i$  and  $i+3$  are shown in 334 structure for clarity. The elongated oval in 227 is the overall C2 symmetry axis of the complex. **c** Details of Interface 2 in 227, which is symmetric and mediated exclusively by heavy chain framework regions (FR). Local C2 axis is indicated with black oval. **d** Details of Interface 2 in 334 that is mediated by light chain framework region 3 (LFR3) and CDRL2 with the heavy chain framework regions 1 and 3 (HFR1 and 3). **e-h** BSA plots of homotypic interface 1 and 2 for 227 (e,f) and 334 (g,h).



Supplementary Figure 8. **Comparison of 311 and 311R X-ray structures.** **a** 311-NPNA<sub>3</sub> crystal structure (PDB 6AXK). Residues that were mutated are shown, with W52 shown for reference. CSP is in gold. **b** 311R-NPNA<sub>3</sub> X-ray structure (this study). **c** Superposition of 311 and 311R structures. **d** Superposition of CSP structures from 6AXK (gray) and 311R (green). **e** Sequence alignment of 311 heavy and light chain variable regions with respective germline sequences. Residues mutated in 311R are shown with arrows.

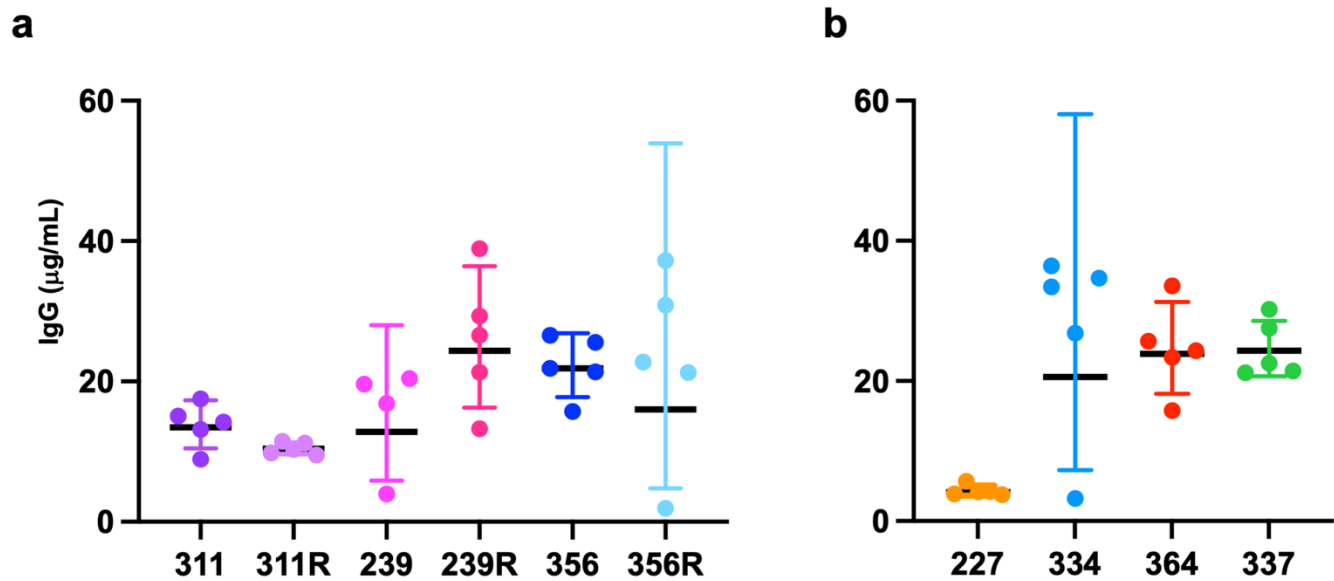

Supplementary Figure 9. **Circulating concentrations of passively administered IgGs in mice, measured at time of challenge.** Serum titers were measured by anti-human IgG ELISA, and calculated based on a standard curve. **a** WT and germline reverted 311, 239, and 356 IgG. **b** WT IgGs of 227, 334, 337, and 364. For each group (antibody), N=5 mice; data points represent individual mice. Error bars represent the geometric mean and SD.

**a****NPNA<sub>4</sub>**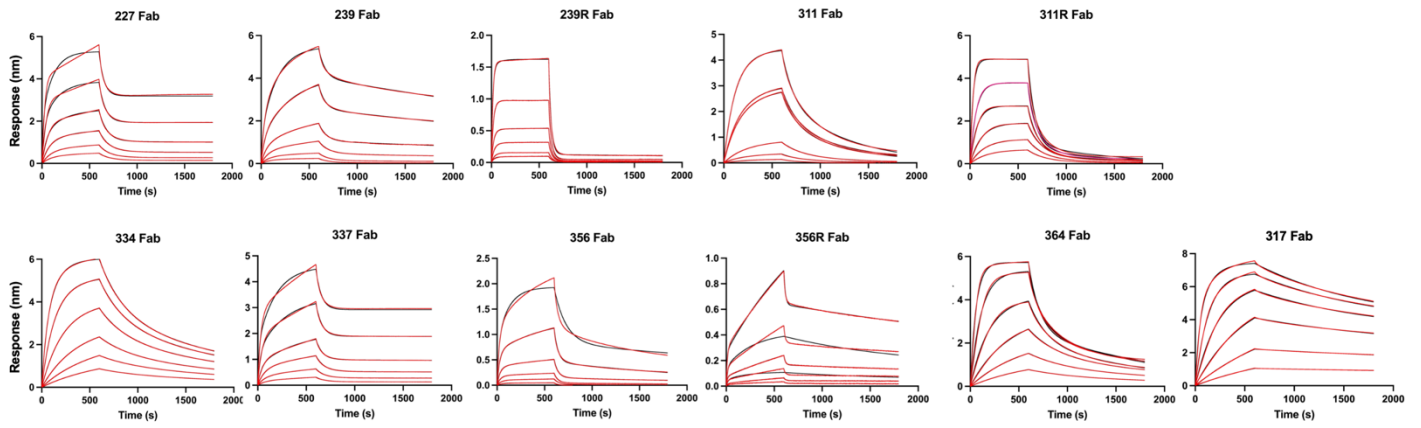**b****NPNA<sub>8</sub>**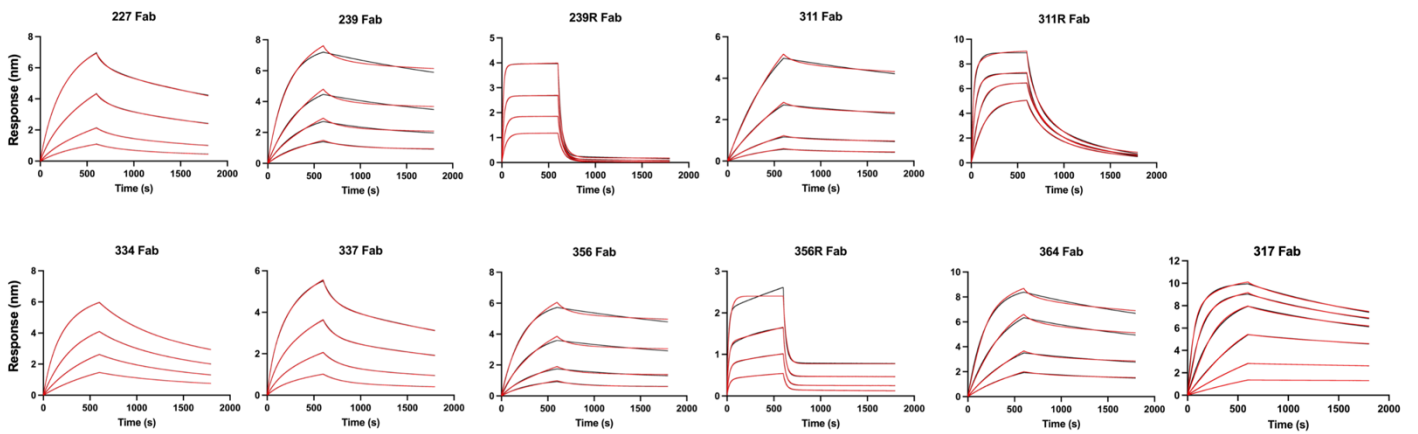**c****rsCSP**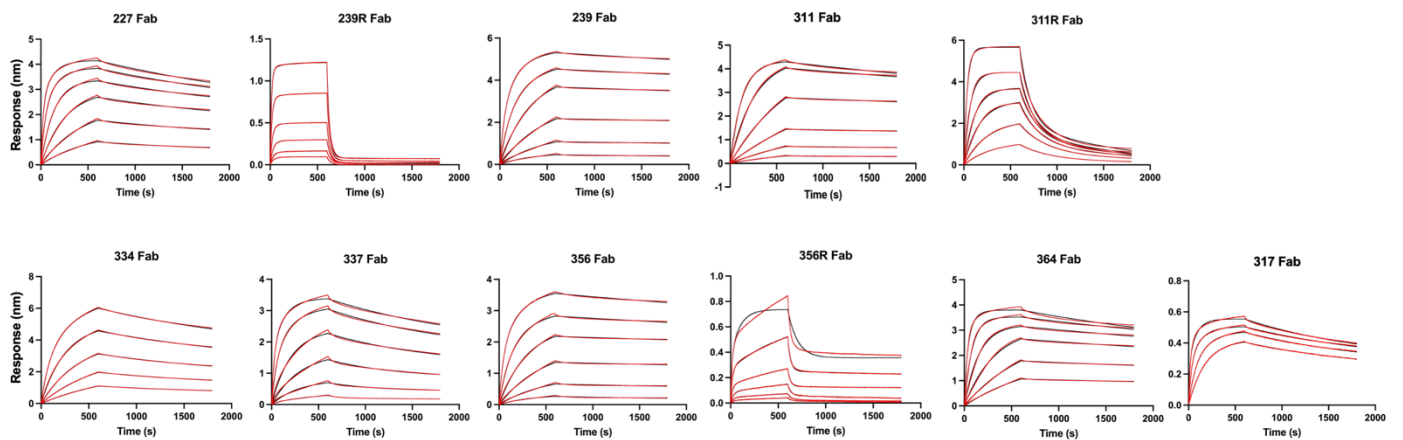

Supplementary Figure 10. **Representative BLI traces for binding of each Fab to PfCSP peptides.** Binding curves (black) were fit with a 2:1 kinetic model in the Octet Data Analysis software (red). Each Fab was titrated over the following concentrations (nM): 200, 100, 50, 25, 12.5, 6.25. Each binding reaction was run in duplicate. Only traces with  $R^2 \geq 0.98$  are shown and were used for affinity calculations, which were averaged across at least four concentrations. **a** NPNA<sub>4</sub> peptide. **b** NPNA<sub>8</sub> peptide. **c** rsCSP (15 NPNA repeats).

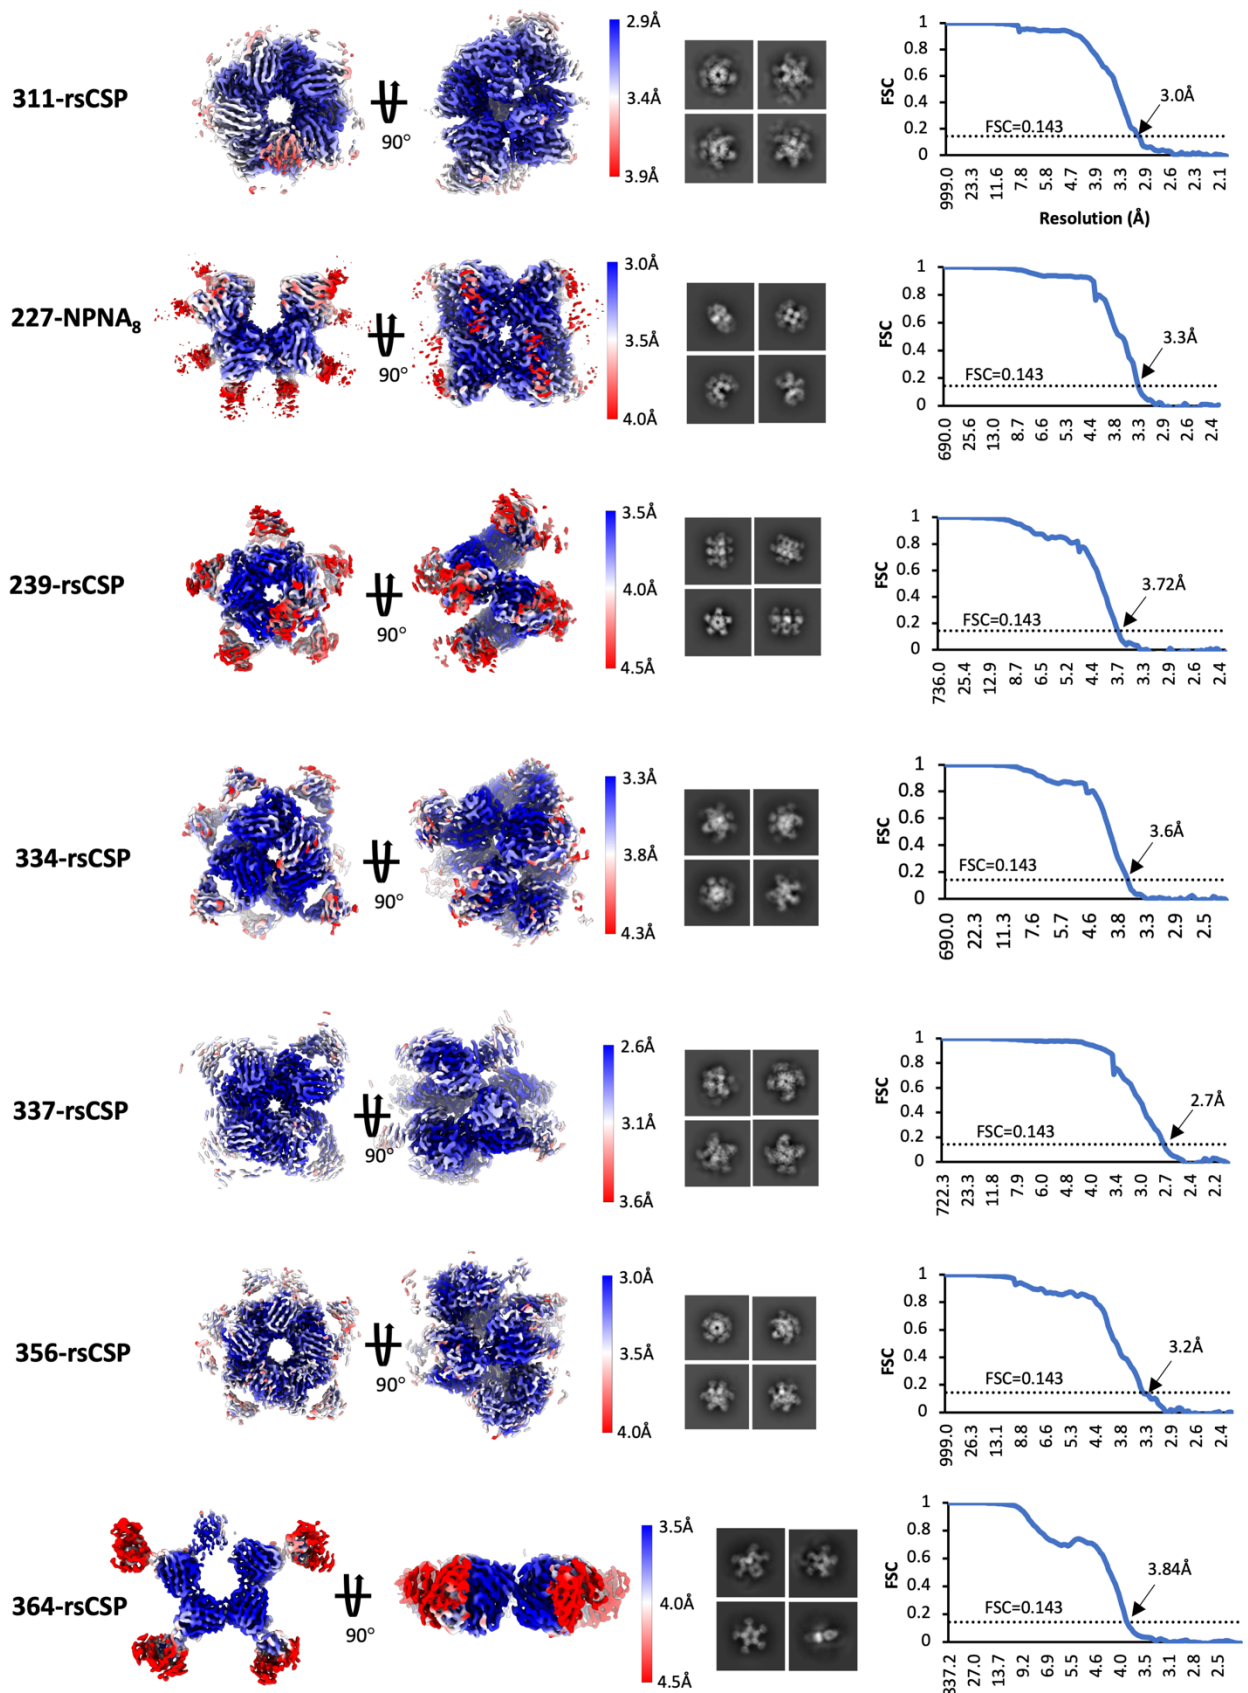



Supplementary Figure 11. **Cryo-EM reconstructions of the seven *IGHV3-33* mAbs in this study.** **Left column:** top and side views of final EM map, colored by local resolution; color key at right. **Middle column:** representative 2D class averages. **Right column:** Fourier shell correlation for the corrected (noise-substituted) reconstruction. Note that for 311-rsCSP, cryo-EM data originally published in Oyen et al. (2018) were reprocessed here with cryoSPARCv2 and RELION3.0.

**Supplementary Table 1.** Cryo-EM data collection parameters and model statistics

|                                                 | <b>227-NPNA<sub>8</sub></b> | <b>239-rsCSP</b> | <b>311-rsCSP</b> | <b>334-rsCSP</b> | <b>337-rsCSP</b> | <b>356-rsCSP</b> | <b>364-rsCSP</b> |
|-------------------------------------------------|-----------------------------|------------------|------------------|------------------|------------------|------------------|------------------|
|                                                 | PDB: 8DYT                   | PDB: 8DYW        | PDB: 8DYX        | PDB: 8DYY        | PDB: 8DZ3        | PDB: 8DZ4        | PDB: 8DZ5        |
|                                                 | EMDB: 27781                 | EMDB: 27784      | EMDB: 27785      | EMDB: 27786      | EMDB: 27787      | EMDB: 27788      | EMDB: 27789      |
| <b>Data Collection</b>                          |                             |                  |                  |                  |                  |                  |                  |
| Microscope                                      | Talos Arctica               | Talos Arctica    | Titan Krios      | Talos Arctica    | Titan Krios      | Talos Arctica    | Talos Arctica    |
| Detector                                        | K2 Summit                   | K2 Summit        | K2 Summit        | K2 Summit        | K2 Summit        | K2 Summit        | K2 Summit        |
| Voltage (kV)                                    | 200                         | 200              | 300              | 200              | 300              | 200              | 200              |
| Pixel Size (Å)                                  | 1.15                        | 1.15             | 1.03             | 1.15             | 1.03             | 1.15             | 1.15             |
| Defocus range (µm)                              | -0.5 to -2.0                | -1.0 to -2.2     | -0.5 to -2.5     | -1.0 to -2.2     | -0.9 to -2.1     | -1.0 to -2.2     | -1.0 to -2.2     |
| Total dose (e <sup>-</sup> /Å <sup>2</sup> )    | 50                          | 50               | 62               | 50               | 50               | 50               | 50               |
| Dose rate (e <sup>-</sup> /Å <sup>2</sup> /sec) | 5.3                         | 5.3              | 5.2              | 5.3              | 5.7              | 5.3              | 5.3              |
| Frames per exposure                             | 50                          | 50               | 48               | 50               | 50               | 50               | 50               |
| <b>Data Processing</b>                          |                             |                  |                  |                  |                  |                  |                  |
| Total micrographs                               | 1595                        | 1610             | 1497             | 2759             | 966              | 696              | 2049             |
| Particle images in map                          | 70,120                      | 227,439          | 399,027          | 458,706          | 461,179          | 189,641          | 723,314          |
| Symmetry imposed                                | C2                          | C1               | C1               | C1               | C1               | C1               | C1               |
| Map res. (FSC=0.143; Å)                         | 3.3                         | 3.72             | 3.01             | 3.62             | 2.68             | 3.2              | 3.84             |
| Map sharpening B-factor (Å <sup>2</sup> )       | -122.5                      | -140.6           | -54.2            | -131.5           | -76.6            | -21.1            | -187             |
| Processing software                             | cryoSPARC v3.3              | cryoSPARC v3.3   | RELION3.0        | cryoSPARC v3.3   | cryoSPARC v3.3   | cryoSPARC v3.3   | cryoSPARC v3.3   |
| <b>Model Refinement</b>                         |                             |                  |                  |                  |                  |                  |                  |
| No. atoms in deposited model                    | 14,586                      | 18,495           | 20,030           | 16,499           | 12,727           | 20,312           | 8950             |
| Chains total                                    | 18                          | 21               | 23               | 19               | 15               | 23               | 11               |
| Residues (protein)                              | 1920                        | 2370             | 2653             | 2133             | 1659             | 2618             | 1155             |
| RMS Deviations                                  |                             |                  |                  |                  |                  |                  |                  |
| Bond lengths (Å)                                | 0.007                       | 0.006            | 0.003            | 0.011            | 0.003            | 0.002            | 0.003            |
| Bond angles (°)                                 | 0.674                       | 0.846            | 0.567            | 0.957            | 0.585            | 0.55             | 0.71             |
| Validation                                      |                             |                  |                  |                  |                  |                  |                  |
| Molprobrity score                               | 1.8                         | 1.93             | 1.37             | 1.92             | 2.0              | 1.53             | 2.0              |
| Clashscore                                      | 8.3                         | 14               | 4.74             | 10               | 7.0              | 6.7              | 12.5             |
| EMRinger score                                  | 4.67                        | 2.57             | 4.54             | 3.28             | 4.1              | 4.16             | 2.2              |
| Poor rotamers (%)                               | 0.45                        | 0.35             | 0.33             | 0.28             | 3.4              | 0.09             | 0.73             |
| Ramachandran plot                               |                             |                  |                  |                  |                  |                  |                  |
| Favored (%)                                     | 94.9                        | 95.9             | 97.3             | 94.1             | 96.5             | 97.1             | 94.6             |
| Allowed (%)                                     | 5.1                         | 3.7              | 2.7              | 5.9              | 3.5              | 2.9              | 5.4              |
| Outliers (%)                                    | 0                           | 0.4              | 0                | 0                | 0                | 0                | 0                |
| Average B-factor                                | 56.9                        | 80.5             | 67.4             | 41.1             | 55.1             | 58.4             | 69.2             |

**Supplementary Table 2.** Buried surface area (BSA) calculations

| mAb | Full Epitope BSA (Å <sup>2</sup> ) |         | Homotypic Interface BSA (Å <sup>2</sup> ) |             |
|-----|------------------------------------|---------|-------------------------------------------|-------------|
|     | Fab BSA                            | CSP BSA | Interface 1                               | Interface 2 |
| 227 | 837                                | 911     | 1042                                      | 552         |
| 239 | 964                                | 1044    | 1139                                      | n/a         |
| 311 | 510                                | 662     | 727                                       | 331         |
| 334 | 1058                               | 1127    | 425                                       | 950         |
| 337 | 941                                | 1110    | 714                                       | 455         |
| 356 | 888                                | 975     | 899                                       | 674         |
| 364 | 878                                | 955     | 738                                       | n/a         |

Supplementary Table 2. **Buried surface areas (BSA) for individual Fabs bound to rsCSP, and for the two homotypic interfaces in the rsCSP complex.**

**Table S3.** Homotypic contacts in 227-NPNA<sub>8</sub> cryo-EM structure

| Interface | Chain Fab 1 | Residue 1 | Position 1 | Atom    | Chain Fab 2 | Residue 2 | Position 2 | Distance (Å) | Predicted interaction |
|-----------|-------------|-----------|------------|---------|-------------|-----------|------------|--------------|-----------------------|
| 1         | H           | GLN       | 1          | NE2-CD2 | D           | LEU       | 95         | 4.1          | Van-der-Waals         |
| 1         | H           | SER       | 25         | C-OD2   | C           | ASP       | 61         | 3.3          | Van-der-Waals         |
| 1         | H           | GLY       | 26         | N-OD2   | C           | ASP       | 61         | 2.4          | H-bond                |
| 1         | H           | GLY       | 26         | N-OD1   | C           | ASP       | 61         | 4.4          | H-bond                |
| 1         | H           | GLY       | 26         | O-CG    | D           | LEU       | 95         | 3.6          | Van-der-Waals         |
| 1         | H           | PHE       | 27         | N-OD2   | C           | ASP       | 61         | 3.7          | H-bond                |
| 1         | H           | PHE       | 27         | O-NH1   | C           | ARG       | 64         | 3.6          | H-bond                |
| 1         | H           | PHE       | 27         | CB-O    | D           | SER       | 94         | 4.3          | Van-der-Waals         |
| 1         | H           | PHE       | 27         | CB-O    | D           | LEU       | 95         | 3.6          | Van-der-Waals         |
| 1         | H           | PHE       | 27         | CB-CA   | D           | LEU       | 95         | 4.1          | Hydrophobic           |
| 1         | H           | THR       | 28         | OG1-CZ3 | C           | TRP       | 47         | 4.5          | Van-der-Waals         |
| 1         | H           | THR       | 28         | CG2-CD1 | C           | TYR       | 58         | 4.5          | Van-der-Waals         |
| 1         | H           | THR       | 28         | OG1-O   | C           | TYR       | 59         | 4.0          | H-bond                |
| 1         | H           | THR       | 28         | CG2-NH2 | C           | ARG       | 64         | 3.2          | Van-der-Waals         |
| 1         | H           | THR       | 28         | OG1-NH2 | C           | ARG       | 64         | 4.2          | H-bond                |
| 1         | H           | THR       | 28         | N-O     | D           | LEU       | 95         | 3.1          | H-bond                |
| 1         | H           | THR       | 28         | OG1-O   | D           | LEU       | 95         | 3.5          | H-bond                |
| 1         | H           | THR       | 28         | OG1-O   | D           | SER       | 95A        | 2.8          | H-bond                |
| 1         | H           | THR       | 28         | OG1-CB  | D           | ALA       | 95B        | 3.7          | Van-der-Waals         |
| 1         | H           | THR       | 28         | OG1-N   | D           | ALA       | 95B        | 4.3          | H-bond                |
| 1         | H           | PHE       | 29         | N-NH1   | C           | ARG       | 64         | 3.9          | Van-der-Waals         |
| 1         | H           | PRO       | 30         | CD-NE   | C           | ARG       | 64         | 3.3          | Van-der-Waals         |
| 1         | H           | ALA       | 31         | CB-OG   | D           | SER       | 95A        | 3.7          | Van-der-Waals         |
| 1         | H           | PHE       | 32         | CZ-O    | D           | SER       | 93         | 3.8          | Van-der-Waals         |
| 1         | H           | PHE       | 32         | CZ-O    | D           | SER       | 94         | 3.4          | Van-der-Waals         |
| 1         | H           | PHE       | 32         | CE2-O   | D           | LEU       | 95         | 3.9          | Van-der-Waals         |
| 1         | H           | PHE       | 32         | CE2-CB  | D           | SER       | 95A        | 3.5          | Van-der-Waals         |
| 1         | H           | ASN       | 73         | O-CD    | C           | ARG       | 64         | 3.9          | Van-der-Waals         |
| 1         | H           | SER       | 74         | O-CG    | C           | ARG       | 64         | 3.8          | Van-der-Waals         |
| 1         | H           | SER       | 74         | O-CA    | C           | GLY       | 65         | 3.3          | Van-der-Waals         |
| 1         | H           | SER       | 74         | O-N     | C           | GLY       | 65         | 3.7          | H-bond                |
| 1         | H           | ASN       | 76         | ND2-OD1 | C           | ASP       | 61         | 3.5          | H-bond                |
| 1         | H           | ASN       | 76         | OD1-CD  | C           | ARG       | 64         | 3.2          | Van-der-Waals         |
| 1         | H           | ASN       | 76         | OD1-NH1 | C           | ARG       | 64         | 3.8          | H-bond                |
| 1         | H           | ASN       | 76         | OD1-NE  | C           | ARG       | 64         | 4.1          | H-bond                |
| 1         | H           | ARG       | 94         | NH1-O   | D           | SER       | 94         | 2.8          | H-bond                |
| 1         | H           | ARG       | 94         | NH2-O   | D           | SER       | 94         | 3.8          | H-bond                |
| 1         | H           | ASN       | 97         | ND2-O   | D           | SER       | 93         | 3.6          | H-bond                |
| 1         | H           | ASN       | 97         | ND2-OG  | D           | SER       | 95A        | 4.4          | H-bond                |
| 1         | L           | SER       | 56         | OG-OG   | D           | SER       | 27         | 2.5          | H-bond                |
| 2         | H           | ARG       | 19         | NH1-NH1 | O           | ARG       | 19         | 3.62         | Van-der-Waals         |
| 2         | H           | ARG       | 19         | NH1-OE1 | O           | GLN       | 81         | 3.39         | H-bond                |
| 2         | H           | ARG       | 19         | NH2-OE1 | O           | GLN       | 81         | 3.44         | H-bond                |
| 2         | H           | ASP       | 72         | OD2-NE2 | O           | HIS       | 82A        | 4.34         | H-bond                |
| 2         | H           | ARG       | 75         | CD-CE1  | O           | HIS       | 82A        | 3.41         | Van-der-Waals         |
| 2         | H           | TYR       | 79         | OH-NE2  | O           | GLN       | 81         | 4.45         | H-bond                |
| 2         | H           | TYR       | 79         | OH-CE1  | O           | HIS       | 82A        | 4.32         | Van-der-Waals         |
| 2         | H           | GLN       | 81         | OE1-NH1 | O           | ARG       | 19         | 3.38         | H-bond                |
| 2         | H           | GLN       | 81         | OE1-NH2 | O           | ARG       | 19         | 3.43         | H-bond                |
| 2         | H           | GLN       | 81         | NE2-OH  | O           | TYR       | 79         | 4.44         | H-bond                |
| 2         | H           | HIS       | 82A        | NE2-OD2 | O           | ASP       | 72         | 4.32         | H-bond                |
| 2         | H           | HIS       | 82A        | CE1-CD  | O           | ARG       | 75         | 3.4          | Van-der-Waals         |
| 2         | H           | HIS       | 82A        | CE1-OH  | O           | TYR       | 79         | 4.31         | Van-der-Waals         |
| 2         | H           | GLN       | 81         | NE2-OH  | O           | TYR       | 79         | 4.44         | H-bond                |
| 2         | H           | HIS       | 82A        | NE2-OD2 | O           | ASP       | 72         | 4.32         | H-bond                |
| 2         | H           | HIS       | 82A        | CE1-CD  | O           | ARG       | 75         | 3.4          | Van-der-Waals         |
| 2         | H           | HIS       | 82A        | CE1-OH  | O           | TYR       | 79         | 4.31         | Van-der-Waals         |

**Supplementary Tables 3-9.** Complete set of homotypic contacts identified in both primary and secondary interfaces for all cryo-EM structures in this study.

**Table S4.** Homotypic contacts in 239-rsCSP cryo-EM structure

| Interface | Chain Fab 1 | Residue 1 | Position 1 | Atom    | Chain Fab 2 | Residue 2 | Position 2 | Distance (Å) | Predicted interaction |
|-----------|-------------|-----------|------------|---------|-------------|-----------|------------|--------------|-----------------------|
| 1         | H           | GLN       | 1          | O-O     | Q           | GLU       | 64         | 4.0          | Van-der-Waals         |
| 1         | H           | GLN       | 1          | N-O     | Q           | GLY       | 65         | 3.0          | H-bond                |
| 1         | H           | VAL       | 2          | CG2-CA  | Q           | GLY       | 65         | 3.5          | Hydrophobic           |
| 1         | H           | VAL       | 2          | N-O     | Q           | GLY       | 65         | 4.1          | H-bond                |
| 1         | H           | VAL       | 2          | CB-CA   | Q           | GLY       | 65         | 4.4          | Hydrophobic           |
| 1         | H           | ARG       | 26         | O-CA    | Q           | GLY       | 65         | 3.5          | Van-der-Waals         |
| 1         | H           | ARG       | 26         | O-N     | Q           | GLY       | 65         | 4.1          | H-bond                |
| 1         | H           | LEU       | 27         | CD1-OE1 | Q           | GLU       | 64         | 3.7          | Van-der-Waals         |
| 1         | H           | THR       | 28         | CG2-O   | Q           | LYS       | 57         | 3.8          | Van-der-Waals         |
| 1         | H           | THR       | 28         | OG1-CE1 | Q           | TYR       | 59         | 3.5          | Van-der-Waals         |
| 1         | H           | THR       | 28         | OG1-OE1 | Q           | GLU       | 64         | 3.5          | H-bond                |
| 1         | H           | THR       | 28         | N-OE1   | Q           | GLU       | 64         | 3.8          | H-bond                |
| 1         | H           | ARG       | 30         | NH2-O   | Q           | SER       | 55         | 3.6          | H-bond                |
| 1         | H           | ARG       | 30         | NE-O    | Q           | SER       | 55         | 4.3          | H-bond                |
| 1         | H           | ARG       | 30         | NE-OD1  | Q           | ASN       | 56         | 3.1          | H-bond                |
| 1         | H           | ARG       | 30         | NH2-OD1 | Q           | ASN       | 56         | 4.2          | H-bond                |
| 1         | H           | ASN       | 31         | ND2-O   | Q           | LYS       | 57         | 2.3          | H-bond                |
| 1         | H           | ASN       | 31         | ND2-CD1 | Q           | PHE       | 58         | 3.3          | Van-der-Waals         |
| 1         | H           | PHE       | 32         | CE2-OE1 | Q           | GLU       | 64         | 3.1          | Van-der-Waals         |
| 1         | H           | PHE       | 32         | CE1-NH2 | R           | ARG       | 95A        | 4.1          | Van-der-Waals         |
| 1         | H           | LYS       | 94         | NZ-CG   | Q           | GLU       | 64         | 4.4          | Van-der-Waals         |
| 1         | H           | TRP       | 96         | NE1-OD2 | Q           | ASP       | 61         | 3.0          | H-bond                |
| 1         | H           | TRP       | 96         | CH2-N   | R           | ASP       | 1          | 3.3          | Van-der-Waals         |
| 1         | H           | TRP       | 96         | O-NH2   | R           | ARG       | 95A        | 2.6          | H-bond                |
| 1         | H           | TRP       | 96         | O-NH1   | R           | ARG       | 95A        | 4.3          | H-bond                |
| 1         | H           | GLY       | 97         | O-O     | R           | TYR       | 94         | 4.2          | Van-der-Waals         |
| 1         | H           | GLY       | 97         | CA-NH2  | R           | ARG       | 95A        | 3.4          | Van-der-Waals         |
| 1         | H           | GLY       | 97         | O-NH2   | R           | ARG       | 95A        | 3.6          | H-bond                |
| 1         | H           | GLY       | 97         | O-NH1   | R           | ARG       | 95A        | 4.5          | H-bond                |
| 1         | H           | GLY       | 98         | C-O     | R           | TYR       | 94         | 4.4          | Van-der-Waals         |
| 1         | H           | GLY       | 98         | N-NH2   | R           | ARG       | 95A        | 4.2          | Van-der-Waals         |
| 1         | H           | ALA       | 99         | CB-NE2  | R           | GLN       | 27         | 3.6          | Van-der-Waals         |
| 1         | H           | ALA       | 99         | CA-O    | R           | TYR       | 94         | 4.1          | Van-der-Waals         |
| 1         | H           | ALA       | 99         | N-O     | R           | TYR       | 94         | 4.3          | H-bond                |
| 1         | H           | ALA       | 99         | CB-OG   | R           | SER       | 95         | 3.3          | Van-der-Waals         |
| 1         | H           | ALA       | 99         | N-OG    | R           | SER       | 95         | 4.4          | H-bond                |
| 1         | H           | TYR       | 102        | OH-O    | Q           | GLU       | 64         | 4.0          | H-bond                |
| 1         | L           | ARG       | 56         | NH1-O   | Q           | ASP       | 61         | 3.1          | H-bond                |
| 1         | L           | ARG       | 56         | NH2-O   | Q           | ASP       | 61         | 3.8          | H-bond                |
| 1         | L           | ARG       | 56         | NH1-CA  | Q           | SER       | 62         | 3.2          | Van-der-Waals         |
| 1         | L           | ARG       | 56         | NH1-O   | Q           | SER       | 62         | 4.0          | H-bond                |
| 1         | L           | ARG       | 56         | CD-NH2  | Q           | ARG       | 83         | 4.0          | Van-der-Waals         |

**Table S5.** Homotypic contacts in 311-rsCSP cryo-EM structure

| Interface | Chain Fab 1 | Residue 1 | Position 1 | Atom    | Chain Fab 2 | Residue 2 | Position 2 | Distance (Å) | Predicted interaction |
|-----------|-------------|-----------|------------|---------|-------------|-----------|------------|--------------|-----------------------|
| 1         | H           | GLY       | 26         | O-O     | Q           | GLU       | 64         | 4.2          | Van-der-Waals         |
| 1         | H           | GLY       | 26         | O-CA    | Q           | GLY       | 65         | 3.6          | Van-der-Waals         |
| 1         | H           | GLY       | 26         | O-N     | Q           | GLY       | 65         | 4.0          | H-bond                |
| 1         | H           | PHE       | 27         | CB-OE2  | Q           | GLU       | 64         | 4.1          | Van-der-Waals         |
| 1         | H           | THR       | 28         | OG1-CE1 | Q           | TYR       | 59         | 3.8          | Van-der-Waals         |
| 1         | H           | THR       | 28         | OG1-OE2 | Q           | GLU       | 64         | 3.5          | H-bond                |
| 1         | H           | THR       | 28         | N-OE2   | Q           | GLU       | 64         | 3.6          | H-bond                |
| 1         | H           | SER       | 30         | O-NH2   | Q           | ARG       | 56         | 3.3          | H-bond                |
| 1         | H           | ASN       | 31         | OD1-NH2 | Q           | ARG       | 56         | 3.1          | H-bond                |
| 1         | H           | ASN       | 31         | OD1-NE  | Q           | ARG       | 56         | 4.4          | H-bond                |
| 1         | H           | ASN       | 31         | ND2-O   | Q           | ASN       | 57         | 2.9          | H-bond                |
| 1         | H           | ASN       | 31         | ND2-CD2 | Q           | PHE       | 58         | 3.7          | Van-der-Waals         |
| 1         | H           | TYR       | 32         | OH-OE1  | Q           | GLU       | 64         | 3.2          | H-bond                |
| 1         | H           | TYR       | 32         | OH-OE2  | Q           | GLU       | 64         | 3.4          | H-bond                |
| 1         | H           | TYR       | 32         | OH-OG   | R           | SER       | 95A        | 4.4          | H-bond                |
| 1         | H           | TYR       | 52A        | CD1-NH2 | Q           | ARG       | 56         | 4.5          | Van-der-Waals         |
| 1         | H           | TYR       | 97         | O-O     | R           | ARG       | 94         | 4.2          | Van-der-Waals         |
| 1         | H           | TYR       | 98         | O-CG    | R           | ARG       | 94         | 3.3          | Van-der-Waals         |
| 1         | H           | TYR       | 98         | OH-NH1  | R           | ARG       | 94         | 3.4          | H-bond                |
| 1         | H           | TYR       | 98         | OH-NE   | R           | ARG       | 94         | 4.1          | H-bond                |
| 1         | H           | TYR       | 98         | OH-NH2  | R           | ARG       | 94         | 4.2          | H-bond                |
| 1         | H           | TYR       | 98         | O-NE    | R           | ARG       | 94         | 4.2          | H-bond                |
| 1         | H           | ASP       | 99         | OD2-CB  | R           | SER       | 27         | 4.4          | Van-der-Waals         |
| 1         | H           | ASP       | 99         | OD2-NH2 | R           | ARG       | 93         | 3.0          | Salt-Bridge           |
| 1         | H           | ASP       | 99         | OD2-NE  | R           | ARG       | 93         | 4.3          | H-bond                |
| 1         | H           | ASP       | 99         | OD1-NH2 | R           | ARG       | 94         | 2.5          | Salt-Bridge           |
| 1         | H           | ASP       | 99         | OD1-NE  | R           | ARG       | 94         | 3.0          | H-bond                |
| 1         | H           | ASP       | 99         | OD2-NE  | R           | ARG       | 94         | 3.2          | H-bond                |
| 1         | H           | ASP       | 99         | OD2-NH2 | R           | ARG       | 94         | 3.6          | Salt-Bridge           |
| 1         | H           | ASP       | 99         | OD1-NH1 | R           | ARG       | 94         | 4.2          | Salt-Bridge           |
| 2         | H           | ARG       | 16         | NH2-O   | X           | THR       | 18         | 3.5          | H-bond                |
| 2         | H           | ARG       | 19         | NH2-CB  | X           | SER       | 67         | 3.7          | Van-der-Waals         |
| 2         | H           | ARG       | 19         | NH1-CB  | X           | SER       | 65         | 4.1          | Van-der-Waals         |
| 2         | H           | ARG       | 19         | NH2-OG  | X           | SER       | 67         | 4.2          | H-bond                |
| 2         | H           | ARG       | 19         | NH2-O   | X           | LYS       | 66         | 4.3          | H-bond                |
| 2         | H           | ARG       | 19         | NH1-OG  | X           | SER       | 65         | 4.4          | H-bond                |

**Table S6.** Homotypic contacts in 334-rsCSP cryo-EM structure

| Interface | Chain Fab 1 | Residue 1 | Position 1 | Atom    | Chain Fab 2 | Residue 2 | Position 2 | Distance (Å) | Predicted interaction |
|-----------|-------------|-----------|------------|---------|-------------|-----------|------------|--------------|-----------------------|
| 1         | H           | ASN       | 31         | OD1-OH  | O           | TYR       | 58         | 2.6          | H-bond                |
| 1         | H           | ASN       | 31         | ND2-CD  | O           | LYS       | 56         | 4.2          | Van-der-Waals         |
| 1         | H           | ASN       | 31         | OD1-NZ  | O           | LYS       | 56         | 4.3          | H-bond                |
| 1         | H           | ASN       | 31         | ND2-OH  | O           | TYR       | 58         | 4.3          | H-bond                |
| 1         | H           | SER       | 98         | O-CB    | P           | TYR       | 94         | 3.8          | Van-der-Waals         |
| 1         | H           | SER       | 99         | CB-OG   | P           | SER       | 95         | 3.9          | Van-der-Waals         |
| 1         | H           | SER       | 99         | CA-O    | P           | TYR       | 94         | 4.1          | Van-der-Waals         |
| 1         | H           | SER       | 99         | O-OE1   | P           | GLN       | 27         | 4.2          | Van-der-Waals         |
| 1         | H           | SER       | 99         | O-OG    | P           | SER       | 95         | 4.4          | H-bond                |
| 1         | H           | SER       | 100        | O-CG    | P           | TYR       | 94         | 3.6          | Van-der-Waals         |
| 2         | H           | ARG       | 16         | NH1-OD1 | T           | ASP       | 17         | 3.1          | Salt-Bridge           |
| 2         | H           | ARG       | 16         | CG-CD   | T           | ARG       | 18         | 3.8          | Van-der-Waals         |
| 2         | H           | ARG       | 16         | NH1-OD2 | T           | ASP       | 17         | 4.4          | Salt-Bridge           |
| 2         | H           | ARG       | 16         | NH1-O   | T           | ARG       | 18         | 4.5          | H-bond                |
| 2         | H           | SER       | 17         | O-NE    | T           | ARG       | 18         | 3.0          | H-bond                |
| 2         | H           | SER       | 17         | OG-OG1  | T           | THR       | 20         | 3.7          | H-bond                |
| 2         | H           | SER       | 17         | O-NH2   | T           | ARG       | 18         | 3.8          | H-bond                |
| 2         | H           | LEU       | 18         | CD1-NH2 | T           | ARG       | 18         | 3.4          | Van-der-Waals         |
| 2         | H           | THR       | 19         | OG1-OG  | T           | SER       | 65         | 3.2          | H-bond                |
| 2         | H           | THR       | 19         | CG2-OG1 | T           | THR       | 74         | 4.1          | Van-der-Waals         |
| 2         | H           | THR       | 68         | CG2-CG  | T           | GLU       | 70         | 3.8          | Van-der-Waals         |
| 2         | H           | SER       | 70         | CB-O    | T           | SER       | 67         | 3.5          | Van-der-Waals         |
| 2         | H           | SER       | 70         | OG-N    | T           | SER       | 67         | 3.5          | H-bond                |
| 2         | H           | SER       | 70         | OG-CA   | T           | GLY       | 66         | 3.8          | Van-der-Waals         |
| 2         | H           | SER       | 70         | OG-O    | T           | SER       | 67         | 3.9          | H-bond                |
| 2         | H           | ARG       | 71         | O-OG    | T           | SER       | 67         | 3.2          | H-bond                |
| 2         | H           | ASP       | 72         | OD2-CG2 | T           | THR       | 31         | 3.2          | Van-der-Waals         |
| 2         | H           | LYS       | 75         | CE-CB   | T           | SER       | 52         | 3.9          | Van-der-Waals         |
| 2         | H           | TYR       | 79         | CD2-CB  | T           | SER       | 65         | 3.7          | Van-der-Waals         |
| 2         | H           | TYR       | 79         | OH-OG   | T           | SER       | 52         | 3.9          | H-bond                |
| 2         | H           | TYR       | 79         | CG-N    | T           | GLY       | 66         | 4.3          | Van-der-Waals         |
| 2         | H           | GLN       | 81         | NE2-CA  | T           | GLY       | 66         | 3.0          | Van-der-Waals         |
| 2         | H           | GLN       | 81         | NE2-C   | T           | SER       | 65         | 3.6          | Van-der-Waals         |
| 2         | H           | GLN       | 81         | NE2-O   | T           | SER       | 65         | 3.7          | H-bond                |
| 2         | H           | GLN       | 81         | NE2-OG  | T           | SER       | 65         | 3.7          | H-bond                |
| 2         | H           | GLN       | 81         | CG-OG1  | T           | THR       | 72         | 3.9          | Van-der-Waals         |
| 2         | H           | GLN       | 81         | OE1-CG  | T           | GLU       | 70         | 4.1          | Van-der-Waals         |
| 2         | H           | GLN       | 81         | NE2-O   | T           | GLU       | 70         | 4.4          | H-bond                |



**Table S7. Homotypic contacts in 337-rsCSP cryo-EM structure**

| Interface | Chain Fab 1 | Residue 1 | Position 1 | Atom    | Chain Fab 2 | Residue 2 | Position 2 | Distance (Å) | Predicted interaction |
|-----------|-------------|-----------|------------|---------|-------------|-----------|------------|--------------|-----------------------|
| 1         | H           | SER       | 28         | OG-N    | M           | LYS       | 57         | 3.3          | H-bond                |
| 1         | H           | SER       | 28         | OG-O    | M           | SER       | 55         | 3.7          | H-bond                |
| 1         | H           | SER       | 28         | OG-O    | M           | LYS       | 57         | 3.8          | H-bond                |
| 1         | H           | SER       | 28         | OG-CA   | M           | LYS       | 56         | 3.9          | Van-der-Waals         |
| 1         | H           | SER       | 30         | OG-CG   | M           | LYS       | 56         | 3.3          | Van-der-Waals         |
| 1         | H           | SER       | 30         | OG-O    | M           | SER       | 55         | 3.3          | H-bond                |
| 1         | H           | SER       | 30         | OG-N    | M           | LYS       | 56         | 4.0          | H-bond                |
| 1         | H           | SER       | 30         | OG-OG   | M           | SER       | 55         | 4.4          | H-bond                |
| 1         | H           | THR       | 31         | CG2-CG  | M           | LYS       | 56         | 3.9          | Van-der-Waals         |
| 1         | H           | THR       | 31         | CG2-CZ  | M           | PHE       | 58         | 4.1          | Van-der-Waals         |
| 1         | H           | THR       | 31         | CG2-O   | M           | LYS       | 57         | 4.1          | Van-der-Waals         |
| 1         | H           | TYR       | 32         | OH-NH2  | M           | ARG       | 64         | 2.5          | H-bond                |
| 1         | H           | TYR       | 32         | OH-NH1  | M           | ARG       | 64         | 4.3          | H-bond                |
| 1         | H           | HIS       | 52         | CD2-CE  | M           | LYS       | 56         | 4.3          | Van-der-Waals         |
| 1         | H           | TYR       | 99         | OH-NH2  | M           | ARG       | 64         | 3.8          | H-bond                |
| 1         | H           | TYR       | 99         | CZ-CE2  | M           | PHE       | 58         | 4.0          | Hydrophobic           |
| 1         | H           | TYR       | 99         | CE1-CD2 | M           | PHE       | 58         | 4.0          | Hydrophobic           |
| 1         | H           | TYR       | 99         | CE1-CE2 | M           | PHE       | 58         | 4.1          | Hydrophobic           |
| 1         | H           | TYR       | 99         | CE2-CE2 | M           | PHE       | 58         | 4.2          | Hydrophobic           |
| 1         | H           | TYR       | 99         | CZ-CD2  | M           | PHE       | 58         | 4.2          | Hydrophobic           |
| 1         | H           | TYR       | 99         | CD1-CD2 | M           | PHE       | 58         | 4.4          | Hydrophobic           |
| 1         | H           | TYR       | 99         | CD1-CE2 | M           | PHE       | 58         | 4.4          | Hydrophobic           |
| 1         | H           | TYR       | 99         | CD1-CZ2 | N           | TRP       | 94         | 3.8          | Hydrophobic           |
| 1         | H           | TYR       | 99         | CD1-CH2 | N           | TRP       | 94         | 3.9          | Hydrophobic           |
| 1         | H           | TYR       | 99         | CE1-CH2 | N           | TRP       | 94         | 4.3          | Hydrophobic           |
| 1         | H           | PHE       | 100        | CZ-O    | N           | THR       | 93         | 2.8          | Van-der-Waals         |
| 1         | H           | PHE       | 100        | CE1-NE1 | N           | TRP       | 94         | 3.2          | Van-der-Waals         |
| 1         | H           | PHE       | 100        | CE1-CD1 | N           | TRP       | 94         | 3.6          | Hydrophobic           |
| 1         | H           | PHE       | 100        | CE1-CE2 | N           | TRP       | 94         | 3.8          | Hydrophobic           |
| 1         | H           | PHE       | 100        | CD1-CD1 | N           | TRP       | 94         | 4.2          | Hydrophobic           |
| 1         | H           | PHE       | 100        | CE1-CG  | N           | TRP       | 94         | 4.4          | Hydrophobic           |
| 1         | H           | PHE       | 100        | CE1-CZ2 | N           | TRP       | 94         | 4.4          | Hydrophobic           |
| 1         | H           | PHE       | 100        | CZ-CD1  | N           | TRP       | 94         | 4.5          | Hydrophobic           |
| 2         | H           | ARG       | 16         | NH1-NH1 | R           | ARG       | 18         | 2.9          | Van-der-Waals         |
| 2         | H           | ARG       | 16         | NH1-CG2 | R           | THR       | 74         | 3.6          | Van-der-Waals         |
| 2         | H           | ARG       | 16         | NH1-OG1 | R           | THR       | 74         | 4.5          | H-bond                |
| 2         | H           | SER       | 17         | CB-OG   | R           | SER       | 65         | 3.9          | Van-der-Waals         |
| 2         | H           | ARG       | 19         | NE-OG   | R           | SER       | 67         | 2.8          | H-bond                |
| 2         | H           | ARG       | 19         | NH2-OG  | R           | SER       | 31         | 2.8          | H-bond                |
| 2         | H           | ARG       | 19         | NE-OG   | R           | SER       | 31         | 3.5          | H-bond                |
| 2         | H           | ARG       | 19         | NH1-OG  | R           | SER       | 31         | 4.1          | H-bond                |
| 2         | H           | ARG       | 19         | NH2-OG  | R           | SER       | 67         | 4.4          | H-bond                |
| 2         | H           | ARG       | 19         | CD-O    | R           | GLY       | 66         | 4.5          | Van-der-Waals         |
| 2         | H           | GLN       | 81         | NE2-CA  | R           | GLY       | 66         | 3.1          | Van-der-Waals         |
| 2         | H           | GLN       | 81         | NE2-N   | R           | SER       | 67         | 3.3          | Van-der-Waals         |
| 2         | H           | GLN       | 81         | OE1-OG  | R           | SER       | 67         | 3.9          | H-bond                |
| 2         | H           | GLN       | 81         | OE1-N   | R           | SER       | 67         | 4.1          | H-bond                |
| 2         | H           | GLN       | 81         | NE2-O   | R           | GLY       | 66         | 4.2          | H-bond                |

**Table S8.** Homotypic contacts in 356-rsCSP cryo-EM structure

| Interface | Chain Fab 1 | Residue 1 | Position 1 | Atom    | Chain Fab 2 | Residue 2 | Position 2 | Distance (Å) | Predicted interaction |
|-----------|-------------|-----------|------------|---------|-------------|-----------|------------|--------------|-----------------------|
| 1         | H           | GLY       | 26         | O-O     | Q           | GLU       | 64         | 4.2          | Van-der-Waals         |
| 1         | H           | GLY       | 26         | O-CA    | Q           | GLY       | 65         | 3.6          | Van-der-Waals         |
| 1         | H           | GLY       | 26         | O-N     | Q           | GLY       | 65         | 4.3          | H-bond                |
| 1         | H           | PHE       | 27         | CB-CG   | Q           | GLU       | 64         | 4.0          | Van-der-Waals         |
| 1         | H           | PHE       | 27         | CA-CA   | Q           | GLY       | 65         | 4.3          | Hydrophobic           |
| 1         | H           | THR       | 28         | CG2-O   | Q           | LYS       | 57         | 4.4          | Van-der-Waals         |
| 1         | H           | THR       | 28         | OG1-CE1 | Q           | TYR       | 59         | 3.2          | Van-der-Waals         |
| 1         | H           | THR       | 28         | OG1-OE2 | Q           | GLU       | 64         | 2.9          | H-bond                |
| 1         | H           | THR       | 28         | N-OE2   | Q           | GLU       | 64         | 3.4          | H-bond                |
| 1         | H           | ARG       | 30         | NH1-O   | Q           | SER       | 55         | 3.6          | H-bond                |
| 1         | H           | ARG       | 30         | NH2-O   | Q           | SER       | 55         | 4.2          | H-bond                |
| 1         | H           | ARG       | 30         | NH1-CA  | Q           | ASN       | 56         | 4.1          | Van-der-Waals         |
| 1         | H           | ARG       | 30         | NH1-OD1 | Q           | ASN       | 56         | 4.2          | H-bond                |
| 1         | H           | ARG       | 30         | NH2-OD1 | Q           | ASN       | 56         | 4.3          | H-bond                |
| 1         | H           | ASN       | 31         | ND2-O   | Q           | LYS       | 57         | 2.7          | H-bond                |
| 1         | H           | ASN       | 31         | OD1-CE2 | Q           | PHE       | 58         | 4.2          | Van-der-Waals         |
| 1         | H           | PHE       | 32         | CZ-OE1  | Q           | GLU       | 64         | 3.8          | Van-der-Waals         |
| 1         | H           | LEU       | 97         | O-OD2   | Q           | ASP       | 61         | 3.8          | Van-der-Waals         |
| 1         | H           | PHE       | 98         | CB-CB   | Q           | ASP       | 61         | 3.7          | Van-der-Waals         |
| 1         | H           | PHE       | 98         | CE1-N   | R           | GLN       | 1          | 3.8          | Van-der-Waals         |
| 1         | H           | TYR       | 99         | O-NE2   | R           | GLN       | 1          | 3.1          | H-bond                |
| 1         | H           | TYR       | 99         | CE2-OD1 | R           | ASN       | 93         | 4.0          | Van-der-Waals         |
| 1         | H           | ASP       | 100        | OD1-CA  | R           | GLN       | 1          | 3.4          | Van-der-Waals         |
| 1         | H           | ASP       | 100        | OD1-N   | R           | GLN       | 1          | 4.2          | H-bond                |
| 1         | H           | ASP       | 100        | OD2-NH2 | R           | ARG       | 27         | 2.7          | Salt-Bridge           |
| 1         | H           | ASP       | 100        | OD1-NH1 | R           | ARG       | 27         | 2.9          | Salt-Bridge           |
| 1         | H           | ASP       | 100        | OD1-NH2 | R           | ARG       | 27         | 3.3          | Salt-Bridge           |
| 1         | H           | ASP       | 100        | OD2-NH1 | R           | ARG       | 27         | 3.6          | Salt-Bridge           |
| 1         | H           | ASP       | 100        | CB-NH2  | R           | ARG       | 27         | 3.6          | Van-der-Waals         |
| 1         | H           | ASP       | 100        | OD2-ND2 | R           | ASN       | 93         | 3.8          | H-bond                |
| 1         | H           | ASP       | 100        | OD1-ND2 | R           | ASN       | 93         | 4.1          | H-bond                |
| 1         | H           | HIS       | 100A       | N-ND2   | R           | ASN       | 93         | 3.6          | Van-der-Waals         |
| 1         | H           | HIS       | 100A       | N-OD1   | R           | ASN       | 93         | 3.6          | H-bond                |
| 1         | H           | ASP       | 100B       | OD2-NH2 | R           | ARG       | 27         | 3.9          | Salt-Bridge           |
| 1         | H           | ASP       | 100B       | N-ND2   | R           | ASN       | 93         | 4.4          | Van-der-Waals         |
| 2         | H           | GLN       | 13         | NE2-OE2 | X           | GLU       | 17         | 3.5          | H-bond                |
| 2         | H           | ARG       | 16         | NH1-CG  | X           | GLU       | 17         | 4.0          | Van-der-Waals         |
| 2         | H           | ARG       | 16         | NH1-OE1 | X           | GLU       | 17         | 4.1          | Salt-Bridge           |
| 2         | H           | ARG       | 16         | NH1-O   | X           | ARG       | 18         | 4.1          | H-bond                |
| 2         | H           | SER       | 17         | O-CD    | X           | ARG       | 18         | 4.5          | Van-der-Waals         |
| 2         | H           | SER       | 17         | OG-CG2  | X           | THR       | 20         | 3.2          | Van-der-Waals         |
| 2         | H           | SER       | 17         | OG-OG1  | X           | THR       | 20         | 3.3          | H-bond                |
| 2         | H           | SER       | 17         | O-OG1   | X           | THR       | 20         | 4.2          | H-bond                |
| 2         | H           | LEU       | 18         | CD1-NH2 | X           | ARG       | 18         | 4.3          | Van-der-Waals         |
| 2         | H           | ARG       | 19         | NE-OG   | X           | SER       | 65         | 3.1          | H-bond                |
| 2         | H           | ARG       | 19         | NH1-OG  | X           | SER       | 65         | 3.6          | H-bond                |
| 2         | H           | ARG       | 19         | NH2-OG  | X           | SER       | 65         | 3.9          | H-bond                |
| 2         | H           | ARG       | 19         | NH2-N   | X           | GLY       | 66         | 3.6          | Van-der-Waals         |
| 2         | H           | ARG       | 19         | NH1-OG1 | X           | THR       | 72         | 4.2          | H-bond                |
| 2         | H           | LYS       | 75         | NZ-OG   | X           | SER       | 52         | 4.3          | H-bond                |
| 2         | H           | GLN       | 81         | OE1-OG1 | X           | THR       | 72         | 4.1          | H-bond                |

**Table S9.** Homotypic contacts in 364-rsCSP cryo-EM structure

| Interface | Chain Fab 1 | Residue 1 | Position 1 | Atom    | Chain Fab 2 | Residue 2 | Position 2 | Distance (Å) | Predicted interaction |
|-----------|-------------|-----------|------------|---------|-------------|-----------|------------|--------------|-----------------------|
| 1         | H           | PHE       | 27         | O-OD2   | E           | ASP       | 61         | 3.4          | Van-der-Waals         |
| 1         | H           | PHE       | 27         | N-OD2   | E           | ASP       | 61         | 4.3          | H-bond                |
| 1         | H           | PHE       | 27         | C-OD2   | F           | ASP       | 1          | 4.0          | Van-der-Waals         |
| 1         | H           | THR       | 28         | CA-OD1  | E           | ASP       | 61         | 3.4          | Van-der-Waals         |
| 1         | H           | THR       | 28         | OG1-OD1 | E           | ASP       | 61         | 3.5          | H-bond                |
| 1         | H           | THR       | 28         | N-OD2   | E           | ASP       | 61         | 3.9          | H-bond                |
| 1         | H           | THR       | 28         | N-OD1   | E           | ASP       | 61         | 4.0          | H-bond                |
| 1         | H           | THR       | 28         | OG1-OD2 | E           | ASP       | 61         | 4.3          | H-bond                |
| 1         | H           | THR       | 28         | CG2-O   | E           | TYR       | 59         | 4.5          | Van-der-Waals         |
| 1         | H           | THR       | 28         | OG1-OD2 | F           | ASP       | 1          | 2.4          | H-bond                |
| 1         | H           | THR       | 28         | OG1-OD1 | F           | ASP       | 1          | 3.0          | H-bond                |
| 1         | H           | THR       | 28         | N-OD2   | F           | ASP       | 1          | 3.2          | H-bond                |
| 1         | H           | THR       | 28         | N-OD1   | F           | ASP       | 1          | 3.5          | H-bond                |
| 1         | H           | THR       | 28         | CG2-CZ  | F           | TYR       | 94         | 3.6          | Van-der-Waals         |
| 1         | H           | SER       | 30         | OG-NE2  | E           | GLN       | 64         | 3.3          | H-bond                |
| 1         | H           | SER       | 30         | OG-OE1  | E           | GLN       | 64         | 4.4          | H-bond                |
| 1         | H           | GLY       | 31         | CA-OH   | F           | TYR       | 94         | 3.4          | Van-der-Waals         |
| 1         | H           | GLY       | 31         | O-NH2   | F           | ARG       | 93         | 3.5          | H-bond                |
| 1         | H           | GLY       | 31         | N-OH    | F           | TYR       | 94         | 4.1          | H-bond                |
| 1         | H           | GLY       | 31         | O-OH    | F           | TYR       | 94         | 4.3          | H-bond                |
| 1         | H           | GLY       | 31         | CA-CZ   | F           | TYR       | 94         | 4.4          | Hydrophobic           |
| 1         | H           | TYR       | 32         | OH-NE   | F           | ARG       | 93         | 3.6          | H-bond                |
| 1         | H           | TYR       | 32         | OH-NH2  | F           | ARG       | 93         | 3.6          | H-bond                |
| 1         | H           | TYR       | 32         | CE1-OD1 | F           | ASP       | 1          | 3.8          | Van-der-Waals         |
| 1         | H           | TYR       | 32         | OH-OD1  | F           | ASP       | 1          | 3.9          | H-bond                |
| 1         | H           | TYR       | 32         | OH-N    | F           | ASP       | 1          | 4.1          | H-bond                |
| 1         | H           | ASN       | 73         | O-CG    | E           | GLN       | 64         | 4.0          | Van-der-Waals         |
| 1         | H           | LYS       | 76         | NZ-CG   | E           | ASP       | 61         | 4.2          | Van-der-Waals         |
| 1         | H           | LYS       | 76         | NZ-OD2  | E           | ASP       | 61         | 4.3          | Salt-Bridge           |
| 1         | H           | ASP       | 97         | OD2-OE1 | F           | GLN       | 27         | 2.7          | Van-der-Waals         |
| 1         | H           | ASP       | 97         | OD2-NE2 | F           | GLN       | 27         | 3.3          | H-bond                |
| 1         | H           | ASP       | 97         | OD1-NE  | F           | ARG       | 93         | 4.1          | H-bond                |

Supplementary Table 10. Summary of biolayer interferometry binding and liver burden data

| mAb  | NPNA <sub>4</sub>      |                        |                      |                      |                         | NPNA <sub>8</sub>      |                        |                      |                      |                         | rsCSP                  |                        |                      |                      |                     | Liver burden (% inh.) |
|------|------------------------|------------------------|----------------------|----------------------|-------------------------|------------------------|------------------------|----------------------|----------------------|-------------------------|------------------------|------------------------|----------------------|----------------------|---------------------|-----------------------|
|      | k <sub>ON</sub> (1/Ms) | k <sub>OFF</sub> (1/s) | K <sub>D1</sub> (nM) | K <sub>D2</sub> (nM) | K <sub>D</sub> avg (nM) | k <sub>ON</sub> (1/Ms) | k <sub>OFF</sub> (1/s) | K <sub>D1</sub> (nM) | K <sub>D2</sub> (nM) | K <sub>D</sub> avg (nM) | k <sub>ON</sub> (1/Ms) | k <sub>OFF</sub> (1/s) | K <sub>D1</sub> (nM) | K <sub>D2</sub> (nM) | K <sub>D</sub> (nM) |                       |
| 227  | 1.3E+05                | 5.8E-03                | 74.7                 | 0.3                  | 37.5                    | 4.0E+04                | 3.5E-03                | 143                  | 17.9                 | 80.3                    | 1.7E+05                | 2.5E-04                | 2.5                  | 0.4                  | 1.6                 | 52.5                  |
| 239  | 1.1E+05                | 6.3E-03                | 56.3                 | 33.1                 | 44.7                    | 8.3E+04                | 5.6E-04                | 14.3                 | 0.1                  | 7.2                     | 1.4E+05                | 6.3E-05                | 0.6                  | 0.4                  | 0.5                 | 81                    |
| 239R | 4.1E+05                | 3.3E-02                | 165                  | -                    | 165                     | 1.2E+05                | 2.2E-02                | 205                  | -                    | 205.0                   | 3.3E+05                | 2.9E-02                | 110                  | -                    | 110.0               | 31.2                  |
| 311  | 2.7E+04                | 4.1E-03                | 353                  | 71.3                 | 212                     | 6.6E+04                | 2.5E-04                | 12.1                 | 0.1                  | 6.1                     | 6.6E+04                | 7.6E-05                | 2.6                  | 0.8                  | 1.7                 | 87.7                  |
| 311R | 7.1E+04                | 8.8E-03                | 131                  | 3.7                  | 67.4                    | 7.1E+04                | 5.1E-03                | 401                  | 21.2                 | 211                     | 6.5E+04                | 5.6E+03                | 93.8                 | 4.0                  | 48.9                | 41.4                  |
| 334  | 5.3E+04                | 2.1E-03                | 55.3                 | 44.5                 | 49.9                    | 5.2E+04                | 1.3E-03                | 35.6                 | 9.4                  | 22.4                    | 1.3E+05                | 1.1E-03                | 8.2                  | 1.7                  | 4.9                 | 83.6                  |
| 337  | 1.3E+05                | 7.0E-03                | 45.4                 | 22.3                 | 36.9                    | 6.6E+04                | 3.5E-03                | 69.8                 | 9.1                  | 39.4                    | 1.5E+05                | 1.3E-03                | 10.8                 | 0.3                  | 5.6                 | 68.4                  |
| 356  | 8.0E+04                | 1.3E-02                | 185                  | 60.7                 | 123                     | 8.7E+04                | 5.6E-04                | 12.6                 | 0.1                  | 6.4                     | 1.4E+05                | 1.1E-04                | 1.3                  | 0.3                  | 0.8                 | 87.7                  |
| 356R | 5.6E+05                | 3.0E-02                | 132                  | 25.8                 | 79.0                    | 7.9E+04                | 1.7E-02                | 245                  | 1.9                  | 124.0                   | 1.6E+05                | 1.6E-02                | 102                  | 31.7                 | 67.0                | 55.9                  |
| 364  | 4.3E+04                | 2.7E-03                | 512                  | 8.4                  | 260                     | 6.5E+04                | 2.7E-04                | 9.7                  | 0.1                  | 4.9                     | 1.3E+05                | 1.2E-04                | 0.95                 | 0.92                 | 0.9                 | 85.4                  |
| 317  | 8.5E+04                | 3.0E-04                | 5.0                  | 2.6                  | 3.8                     | 6.9E+04                | 1.9E-04                | 3.1                  | 2.8                  | 2.9                     | 8.3E+05                | 3.4E-04                | 0.4                  | 0.3                  | 0.4                 | 91.4                  |

Supplementary Table 10. **Summary of biolayer interferometry binding and liver burden data.** Kinetic parameters are averages across at least 4 fits with  $R^2 \geq 0.98$ . All binding curves were fit with a 2:1 kinetic model except for 239R, which displayed 1:1 kinetics.  $K_{ON}$  and  $K_{OFF}$  values are an average of the two association and dissociation constants. BLI was run in duplicate and reported values are an average of the two experiments.

**Supplementary Table 11. X-ray data collection and refinement statistics (molecular replacement) for 311R Fab**

|                                                      | 311R-(NPNA)3                                  |
|------------------------------------------------------|-----------------------------------------------|
| <b>Data collection</b>                               |                                               |
| Space group                                          | P2 <sub>1</sub> 2 <sub>1</sub> 2 <sub>1</sub> |
| Cell dimensions                                      |                                               |
| <i>a</i> , <i>b</i> , <i>c</i> (Å)                   | 45.41, 70.77, 170.25                          |
| $\alpha$ , $\beta$ , $\gamma$ (°)                    | 90.00, 90.00, 90.00                           |
| Resolution (Å)                                       | 1.90(1.94-1.90)                               |
| <i>R</i> <sub>sym</sub> or <i>R</i> <sub>merge</sub> | 0.055 (0.625)                                 |
| <i>I</i> / $\sigma$ <i>I</i>                         | 17.2(1.6)                                     |
| Completeness (%)                                     | 99.8(97.6)                                    |
| Redundancy                                           | 3.3(2.3)                                      |
| <b>Refinement</b>                                    |                                               |
| Resolution (Å)                                       | 1.90                                          |
| No. reflections                                      | 44216                                         |
| <i>R</i> <sub>work</sub> / <i>R</i> <sub>free</sub>  | 0.1839/ 0.2216                                |
| No. atoms                                            | 3500                                          |
| Protein                                              | 3327                                          |
| Ligand/ion                                           |                                               |
| Water                                                | 173                                           |
| <i>B</i> -factors                                    | 40.0                                          |
| Protein                                              | 39.91                                         |
| Ligand/ion                                           |                                               |
| Water                                                | 46.77                                         |
| R.m.s. deviations                                    |                                               |
| Bond lengths (Å)                                     | 0.0119                                        |
| Bond angles (°)                                      | 1.7183                                        |

\*Single crystal. \*Values in parentheses are for highest-resolution shell.

## REFERENCES

1. Oyen, D. et al. Structural basis for antibody recognition of the NANP repeats in Plasmodium falciparum circumsporozoite protein. *Proc Natl Acad Sci U S A* **114**, E10438-E10445 (2017).
2. Pholcharee, T. et al. Diverse Antibody Responses to Conserved Structural Motifs in Plasmodium falciparum Circumsporozoite Protein. *J Mol Biol* **432**, 1048-1063 (2020).
3. Pholcharee, T. et al. Structural and biophysical correlation of anti-NANP antibodies with in vivo protection against P. falciparum. *Nat Commun* **12**, 1063 (2021).
